# Supplementary material for: Prenylation of aromatic amino acids and plant phenolics by an aromatic prenyltransferase from Rasamsonia emersonii
Source: Springer Nature journal article supplement (doi:10.1007/s00253-024-13254-8), 2024-07-18
Supplement: MOESM1 [file 253_2024_13254_MOESM1_ESM.pdf]

# Supplementary information

## Prenylation of aromatic amino acids and plant phenolics by an aromatic prenyltransferase from *Rasamsonia emersonii*

Pimvisuth Chunkruea<sup>1</sup>, Kai P. Leschonski<sup>1</sup>, Alejandro A. Gran-Scheuch<sup>2</sup>, Gijs J. C. Vreeke<sup>1</sup>, Jean-Paul Vincken<sup>1</sup>, Marco W. Fraaije<sup>2</sup>, Willem J. H. van Berkel<sup>1</sup>, Wouter J. C. de Bruijn<sup>1</sup>, Mirjam A. Kabel<sup>1\*</sup>

<sup>1</sup> Laboratory of Food Chemistry, Wageningen University, Bornse Weiland 9, 6708 WG Wageningen, The Netherlands

<sup>2</sup> Molecular Enzymology Group, University of Groningen, Nijenborgh 4, 9747 AG Groningen, The Netherlands

\* Corresponding author: Mirjam A. Kabel

Telephone: +31 (0)317 483209

Email: mirjam.kabel@wur.nl

## Supplementary tables

|                 |                                                                                                                                                                        |    |
|-----------------|------------------------------------------------------------------------------------------------------------------------------------------------------------------------|----|
| <b>Table S1</b> | Aromatic substrates used in the substrate screening                                                                                                                    | 4  |
| <b>Table S2</b> | Nucleotide and amino acid sequences of His-SUMO-RePT, and primer sequences used in gene sequencing                                                                     | 6  |
| <b>Table S3</b> | Substrate conversion, UV and MS data, and the tentative identification of enzymatic products from RePT reactions in the presence of DMAPP and well-accepted substrates | 20 |
| <b>Table S4</b> | Substrate recovery (%) of aromatic substrates well-accepted by RePT                                                                                                    | 25 |
| <b>Table S5</b> | NMR data of <b>1a</b> and <b>1b</b> , <b>2b</b> , and <b>8b</b>                                                                                                        | 26 |
| <b>Table S6</b> | ESI-FT-MS data of the purified prenylated products produced using RePT                                                                                                 | 39 |

## Supplementary figures

|                       |                                                                                                                                                                                                                                     |    |
|-----------------------|-------------------------------------------------------------------------------------------------------------------------------------------------------------------------------------------------------------------------------------|----|
| <b>Fig. S1-3</b>      | The results of using 3,4,5-trimethoxycinnamic acid (TMCA) as an internal standard for RePT reaction                                                                                                                                 | 7  |
| <b>Fig. S4</b>        | Nucleotide and amino acid sequences of His-SUMO-RePT, and primer sequences used in gene sequencing                                                                                                                                  | 8  |
| <b>Fig. S5</b>        | A structural model of untagged RePT acquired using AlphaFold2 colored according to pLDDT score and the order of amino acids                                                                                                         | 10 |
| <b>Fig. S6</b>        | Structural models of an N-terminal truncated AtaPT in an apo state and the untagged RePT acquired using AlphaFold2                                                                                                                  | 11 |
| <b>Fig. S7</b>        | An expanded view of the active site architecture of RePT                                                                                                                                                                            | 12 |
| <b>Fig. S8</b>        | An expanded view of the active site architecture of four DMATs                                                                                                                                                                      | 13 |
| <b>Fig. S9</b>        | SDS-PAGE analysis of the purified His-SUMO-RePT                                                                                                                                                                                     | 14 |
| <b>Fig. S10</b>       | MS spectrum of intact His-SUMO-RePT                                                                                                                                                                                                 | 14 |
| <b>Fig. S11</b>       | Quantitative coverage of amino acids after peptide analysis of His-SUMO-RePT digested with porcine trypsin and <i>Bacillus licheniformis</i> protease                                                                               | 15 |
| <b>Fig. S12</b>       | Peptides released upon digestion of RePT hydrolyzed by porcine trypsin and BLP                                                                                                                                                      | 15 |
| <b>Fig. S13</b>       | Substrate conversion of <b>1</b> and resveratrol <b>8</b> by RePT in the presence of DMAPP at three pHs                                                                                                                             | 16 |
| <b>Fig. S14</b>       | Substrate conversion of <b>1</b> by RePT in the presence of DMAPP throughout 24-hours incubation at different reaction conditions: two different enzyme concentrations/methanol content/buffers/pHs                                 | 16 |
| <b>Fig. S15</b>       | Substrate conversion (%) and relative abundance of prenylated products (%) by RePT in the presence of DMAPP and <b>1</b> , <b>2</b> , or <b>8</b> with different reaction conditions (enzyme concentration, additives, time points) | 17 |
| <b>Fig. S16</b>       | Substrate conversion of <b>1</b> converted by RePT when using different concentrations of <b>1</b> (0.1-20 mM)                                                                                                                      | 17 |
| <b>Fig. S17</b>       | UHPLC-UV chromatograms of enzymatic reactions of RePT towards well-accepted substrates in the presence of DMAPP                                                                                                                     | 18 |
| <b>Fig. S18 – S20</b> | NMR spectra of <b>1a</b>                                                                                                                                                                                                            | 27 |
| <b>Fig. S21 - S23</b> | NMR spectra of <b>1b</b>                                                                                                                                                                                                            | 30 |
| <b>Fig. S24 - S26</b> | NMR spectra of <b>2b</b>                                                                                                                                                                                                            | 33 |
| <b>Fig. S27 - S29</b> | NMR spectra of <b>8b</b>                                                                                                                                                                                                            | 36 |
| <b>Fig. S30</b>       | Experimental data involved in DMAPP synthesis                                                                                                                                                                                       | 40 |

## Supplementary methods

|                                                                    |    |
|--------------------------------------------------------------------|----|
| Synthesis of dimethylallyl pyrophosphate tri-ammonium salt (DMAPP) | 39 |
| Upscaled production of prenylated compounds                        | 40 |

**Table S1** Aromatic substrates used in substrate screening for RePT. Compounds accepted with > 10 % conversion, 1-10 % conversion, and < 1% conversion are shown in green, blue, and grey, respectively.

| No. | Group                                            | Compound              | CAS no.     | Purity (%) | Supplier <sup>a</sup>          |
|-----|--------------------------------------------------|-----------------------|-------------|------------|--------------------------------|
| 1   | Amino acids                                      | L-Tryptophan          | 73-22-3     | ≥98        | Sigma-Aldrich                  |
| 2   |                                                  | L-Tyrosine            | 60-18-4     | ≥98        | Sigma-Aldrich                  |
| 3   | Cyclic dipeptides                                | Cyclo(L-Trp-L-Trp)    | 20829-55-4  | ≥98        | Cayman Chemical                |
| 4   |                                                  | Cyclo(L-Trp-L-Pro),   | 38136-70-8  | ≥98        | Cayman Chemical                |
| 5   | Stilbenes                                        | Oxyresveratrol        | 29700-22-9  | ≥98        | Cayman Chemical                |
| 6   |                                                  | Piceatannol           | 10083-24-6  | >98        | Cayman Chemical                |
| 7   |                                                  | Pinostilbene          | 42438-89-1  | >97        | Tokyo Chemical                 |
| 8   |                                                  | Resveratrol           | 501-36-0    | ≥99        | Sigma-Aldrich                  |
| 9   |                                                  | Pinosylvin            | 22139-77-1  | ≥97        | Sigma-Aldrich                  |
| 10  | Dihydrochalcones                                 | Phloretin             | 60-82-2     | ≥99        | Sigma-Aldrich                  |
| 11  | Flavonoids: Chalcones                            | Isoliquiritigenin     | 961-29-5    | >98        | Tokyo Chemical                 |
| 12  |                                                  | Cardamonin            | 19309-14-9  | ≥98        | Sigma-Aldrich                  |
| 13  |                                                  | Xanthohumol           | 6754-58-1   | ≥99        | Carl Roth                      |
| 14  | Flavonoids: Flavanols                            | (+)-Catechin          | 225937-10-0 | >97        | Tokyo Chemical                 |
| 15  |                                                  | (-)-Epicatechin       | 490-46-0    | >97        | Tokyo Chemical                 |
| 16  | Flavonoids: Flavanonols                          | Taxifolin             | 480-18-2    | 99         | Selleckchem                    |
| 17  | Flavonoids: Flavonols                            | Kaempferol            | 520-18-3    | ≥99        | Extrasynthese                  |
| 18  |                                                  | Quercetin             | 849061-97-8 | 95         | Thermo Scientific              |
| 19  | Flavonoids: Flavanones                           | Naringenin            | 67604-48-2  | >93        | Tokyo Chemical                 |
| 20  |                                                  | Sakuranetin           | 520-29-6    | ≥95        | Sigma-Aldrich                  |
| 21  |                                                  | Eriodictyol           | 4049-38-1   | ≥99        | Extrasynthese                  |
| 22  | Flavonoids: Flavones                             | Apigenin              | 520-36-5    | ≥99        | INDOFINE Chemical              |
| 23  |                                                  | Luteolin              | 491-70-3    | ≥98        | Extrasynthese                  |
| 24  |                                                  | Baicalein             | 491-67-8    | 98         | Sigma-Aldrich                  |
| 25  | Isoflavonoids: Isoflavans                        | (±)-Equol             | 94105-90-5  | ≥98        | Cayman Chemical                |
| 26  |                                                  | Glabridin             | 59870-68-7  | ≥98        | Sigma-Aldrich                  |
| 27  | Isoflavonoids: Isoflavones                       | Daidzein              | 486-66-8    | ≥95        | Cayman Chemical                |
| 28  |                                                  | Genistein             | 446-72-0    | ≥98        | Cayman Chemical                |
| 29  |                                                  | Glycitein             | 40957-83-3  | ≥98        | FUJIFILM Wako Chemicals Europe |
| 30  |                                                  | Formononetin          | 485-72-3    | ≥99        | Sigma-Aldrich                  |
| 31  |                                                  | Biochanin A           | 491-80-5    | ≥95        | Sigma-Aldrich                  |
| 32  | Isoflavonoids: Coumestans                        | Coumestrol            | 479-13-0    | ≥95        | Sigma-Aldrich                  |
| 33  | Benzopyrones: Coumarins                          | Esculetin             | 305-01-1    | ≥95        | Sigma-Aldrich                  |
| 34  | Benzophenones                                    | 4-hydroxybenzophenone | 1137-42-4   | 98         | Sigma-Aldrich                  |
| 35  | Phenolic amides                                  | Avenanthramide A      | 108605-70-5 | ≥98        | Sigma-Aldrich                  |
| 36  |                                                  | Avenanthramide B      | 108605-69-2 | ≥98        | Sigma-Aldrich                  |
| 37  |                                                  | Avenanthramide C      | 116764-15-9 | ≥98        | Sigma-Aldrich                  |
| 38  | Hydroxybenzoic acid and methoxylated derivatives | 4-Hydroxybenzoic acid | 99-96-7     | 99         | Sigma-Aldrich                  |
| 39  |                                                  | Vanillic acid         | 121-34-6    | 97         | Sigma-Aldrich                  |
| 40  |                                                  | Syringic acid         | 530-57-4    | ≥95        | Sigma-Aldrich                  |
| 41  | Cinnamic acids and aldehyde derivatives          | trans-Cinnamic acid   | 140-10-3    | ≥99        | Sigma-Aldrich                  |
| 42  |                                                  | p-Coumaric acid       | 501-98-4    | ≥98        | Sigma-Aldrich                  |
| 43  |                                                  | trans-Ferulic acid    | 537-98-4    | ≥99        | Sigma-Aldrich                  |

| No. | Group                   | Compound                      | CAS no.    | Purity (%) | Supplier <sup>a</sup> |
|-----|-------------------------|-------------------------------|------------|------------|-----------------------|
| 44  |                         | Sinapic acid                  | 530-59-6   | ≥98        | Sigma-Aldrich         |
| 45  |                         | 3,4,5-Trimethoxycinnamic acid | 90-50-6    | >98        | Tokyo Chemical        |
| 46  | Monolignols             | Coniferyl alcohol             | 458-35-5   | 98         | Sigma-Aldrich         |
| 47  |                         | Sinapyl alcohol               | 537-33-7   | 80         | Sigma-Aldrich         |
| 48  | Lignin (related) dimers | Guaiacylglycerol-β-guaiacyl   | 7382-59-4  | >97        | Tokyo Chemical        |
| 49  |                         | Veratrylglycerol-β-guaiacyl   | 10535-17-8 | 97         | abcr Gute Chemie      |
| 50  |                         | Hydrocoerulignone             | 25496-72-4 | 95         | MP Biomedicals        |

<sup>a</sup> abcr Gute Chemie (Karlsruhe Germany), Carl Roth (Karlsruhe, Germany), Cayman Chemical (Ann Arbor, MI, USA), Extrasynthese (Genay, France), FUJIFILM Wako Chemicals Europe (Neuss, Germany), INDOFINE Chemical (Hillsborough, NJ, USA), MP Biomedicals (Irvine, CA, USA), Selleckchem (Houston, TX, USA), Sigma-Aldrich (St. Louis, MO, USA), Thermo Scientific Chemicals (Waltham, MA, USA), and Tokyo Chemical Industry (TCI Europe) (Zwijndrecht, Belgium).

**Table S2** Nucleotide and amino acid sequences of His-SUMO-RePT, and primer sequences used in gene sequencing. The sequence of the SUMO-tag is represented as **bold text**, and the sequence of RePT is represented as underlined text.

|                                                               | Sequence                                                                                                                                                                                                                                                                                                                                                                                                                                                                                                                                                                                                                                                                                                                                                                                                                                                                                                                                                                                                                                                                                                                                                                                                                                                                                                                                                                                                                                                                                                                                                                                                                                                                                                                                                                                                                                                                                                                                                                                                                                                                                                                                                                                       |
|---------------------------------------------------------------|------------------------------------------------------------------------------------------------------------------------------------------------------------------------------------------------------------------------------------------------------------------------------------------------------------------------------------------------------------------------------------------------------------------------------------------------------------------------------------------------------------------------------------------------------------------------------------------------------------------------------------------------------------------------------------------------------------------------------------------------------------------------------------------------------------------------------------------------------------------------------------------------------------------------------------------------------------------------------------------------------------------------------------------------------------------------------------------------------------------------------------------------------------------------------------------------------------------------------------------------------------------------------------------------------------------------------------------------------------------------------------------------------------------------------------------------------------------------------------------------------------------------------------------------------------------------------------------------------------------------------------------------------------------------------------------------------------------------------------------------------------------------------------------------------------------------------------------------------------------------------------------------------------------------------------------------------------------------------------------------------------------------------------------------------------------------------------------------------------------------------------------------------------------------------------------------|
| Codon-<br>optimized<br>nucleotide<br>sequence                 | ATGGGCAGCAGCCATCATCATCATCACGGCAGCGGCCTGGTGCCGCGCGGCAGC<br>GTCAGCATGTCGGACTCAGAAGTCAATCAAGAAGCTAAGCCAGAGGTCAAGCCA<br><b>GAAGTCAAGCCTGAGACTCACATCAATTTAAAGGTGTCCGATGGATCTTCAGAG</b><br><b>ATCTTCTTCAAGATCAAAAAGACCACTCCTTTAAGAAGGCTGATGGAAGCGTTC</b><br><b>GCTAAAAGACAGGGTAAGGAAATGGACTCCTTAAGATTCTTGTACGACGGTATT</b><br><b>AGAATTCAAGCTGATCAGACCCCTGAAGATTTGGACATGGAGGATAACGATATT</b><br><b>ATTGAGGCTCACAGAGAACAGATTGGTGGTATGGCACCTGGCAGTCATTCCACAG</b><br><u>CGAACTTGACTCATGCGACCGACAGCGCATCCCTGTTGCCGCCTGTTGCAGCCCCGCC</u><br><u>CTGCCACTTCCTTAGACAATAGCGTGTATCATTCACTCACCTCAGTTCTGGAGTTTCGC</u><br><u>CGATCAAGATCAACTTTTTCTGGTGGACCGAGACAGCCTCGATTGTTGCGAAACTGAT</u><br><u>GGAAAGCGCCGGTTACGACGTGGAGTCACAACGTCGCTATCTGCTGCTTTACCACGC</u><br><u>ACACATCCTGGCCGCATTAGGTCCCAAGCAGACGCCGTGTCCGTCCGACCGCTCCGC</u><br><u>CAGTTCGCCATGGAAGTCTTTTATGACAGACGACCATACTCCCATTGAGATCAGCTG</u><br><u>GAATCTTGGGGCCAATCGCTCTGTGGTGC GCCTGTCGATTGAGCCTATTGGTCTTTTC</u><br><u>GCTGGTACCAGCTTTGATCCGTTCAACCAGCGCCCCGCGCTTGAGCTTCTCCAACAGT</u><br><u>TGCCAGGTATCGACCTGCAACTGTTTTACTACTTCCGTGACTGGTTCTTCATTGATGA</u><br><u>CGACGACGTGACGACGTACTTAAGCGCCGTCCTGCTGGTGAGCATAGCTCGCAACT</u><br><u>CTTTGTAGCTTTCGACTTTGATGGTGGCAAGGTTACGACCAAGGCGTACATTTTCCCG</u><br><u>CTCTTAAAGGCACTTGAAACCGGAATTCCGGTCTTGGA CTTGTTAGCACGGCGATC</u><br><u>CGCAATTTAGATGAGCCAGCGTTATCCGTCAGCCCTGGCTGGAACGTA CTGAGGAC</u><br><u>TTCATTGCGAGTTGCCCCGATTGCGTCACGTCCTAAGCTGGAATTTATCGCGATCGACT</u><br><u>GTGTCGCGCCTGAGAAGTCCCGCATCAAAATCTACGTACGCACACCCCATACGGCTT</u><br><u>TAGAGAAAGTTAAGGATGTATTTACTCTTGGTGGCCGCTTAAATGACCAAACCATCC</u><br><u>AAACCGCATTGGGCATGCTCGAGGAGCTTTGGCGCCTCGTCCTCGACCTGCCCCGACG</u><br><u>GGTTACGCGATAGTGATGAGTTGCACCCTCGCGACGAGAATTCAGCGGGGCATCGTA</u><br><u>CGAGCGGAGTATTGTTTAATTTGAGATCAAGCCAGGCGCCGCGCTGCCGGAACCTA</u><br><u>AATTATACATCCCAGTCCGTCATTACGCGCGTAGTGACCTCGATATTGCACGCGGCTT</u><br><u>GACCGCGTTCTTCCGTCGTCGTGGTTGGACATCCCTGGCGGAGACTTATACTGACAC</u><br><u>CTTAAAAGAGACGTTCCCGCACCATCCTCTGGCGGAGTCTACCAGTACTCACACGTA</u><br><u>TATCGTCTTGCCTTTAAGAAGACCACAGGGGTGATTTA ACTGCGTATTATAATCCT</u><br><u>CAGGTGTATGCGCGTCCCAAGCCGAGTGAGAAGTTGGAGTGGACGAAGGACCGTCT</u><br><u>GCGCGGACATCGTCTTTGA</u> |
| Amino acid<br>sequence<br>confirmed by<br>peptide<br>analysis | GSSHHHHHHGSLVPRGSASMS <b>DSEVNQEAKPEVKPEVKPE</b> THINLKVSDGSSEIFFK<br><b>IKKTTPLRRLMEAF</b> <b>AKRQ</b> GKEMDSLRF <b>LYDGIRIQADQTPEDLDMEDNDIIEAHRE</b><br><b>QIGG</b> MAPGSHSTANLTHATDSASLLPPVAARPATSLDNSVYHSLTSVLEFADQDQLFW<br>WTETASIVAKLMESAGYDVESQRRYLLLYHAHILAALGPKQTPCPSDRSASSPWKSFMT<br>DDHTPIEISWNLGANRSVVRLSIEPIGPFAGTSFDPFNQRPALLLQQLPGIDLQLFYFRD<br>WFFIDDDVDVLDKRRPAGEHSSQLFVAFDFDGGKVTTKAYIFLLKALETGIPVLDLVS<br>TAIRNLDEPALSVPGWNVLEDFIRSCPIASRPKLEFIAIDCVAPEKSRIKIYVRTPHTALEK<br>VKDVF <del>TL</del> GGRLNDQTIQTALGMLEELWRLVLDLPDGLRDSDELHPRDENSAGHRTSGV<br>LNF <del>EIK</del> PGAALPEPKLYIPVRHYARSDLDIARGLTAFFRRRGWTSLAETYDTLKETFPH<br>HPLAESTSTHTYIVFAFKKTTGVYLTAYYNPQVYARPKPSEKLEWTKDRLRGHRL                                                                                                                                                                                                                                                                                                                                                                                                                                                                                                                                                                                                                                                                                                                                                                                                                                                                                                                                                                                                                                                                                                                                                                                                                                                                                                                                                                                                                                                                                  |
| Primer (5'-3')                                                | ATGCCATAGCATTTTATCC                                                                                                                                                                                                                                                                                                                                                                                                                                                                                                                                                                                                                                                                                                                                                                                                                                                                                                                                                                                                                                                                                                                                                                                                                                                                                                                                                                                                                                                                                                                                                                                                                                                                                                                                                                                                                                                                                                                                                                                                                                                                                                                                                                            |
| Primer (3'-5')                                                | GGACTATGTCTAATTTAG                                                                                                                                                                                                                                                                                                                                                                                                                                                                                                                                                                                                                                                                                                                                                                                                                                                                                                                                                                                                                                                                                                                                                                                                                                                                                                                                                                                                                                                                                                                                                                                                                                                                                                                                                                                                                                                                                                                                                                                                                                                                                                                                                                             |

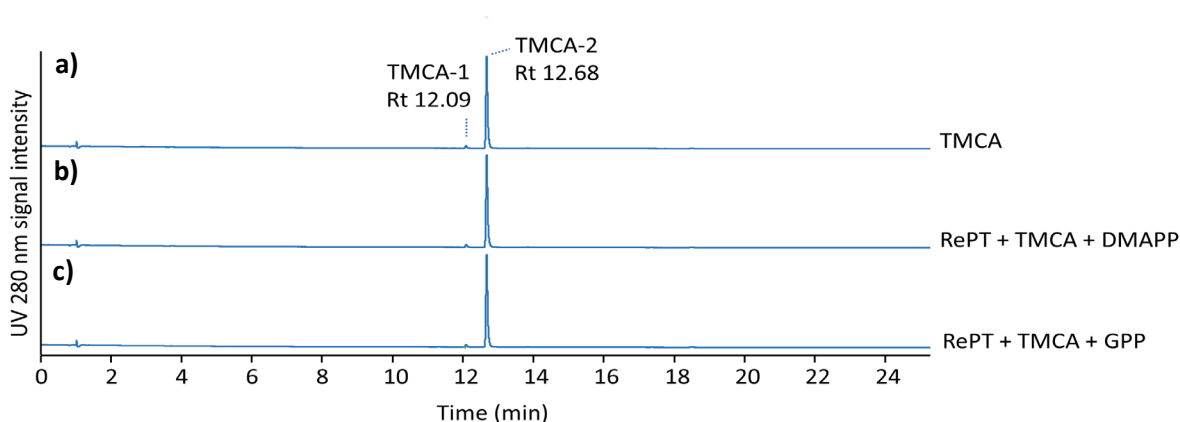

**Fig. S1** UHPLC-UV chromatograms of **a)** 3,4,5-trimethoxycinnamic acid (TMCA) isomers (TMCA-1 is *cis*-TMCA and TMCA-2, is *trans*-TMCA). The peak area ratio TMCA-2:TMCA-1 is 39:1. **b)** Incubation of RePT with TMCA in the presence of DMAPP and **c)** of GPP. No product formation was observed in both reactions.

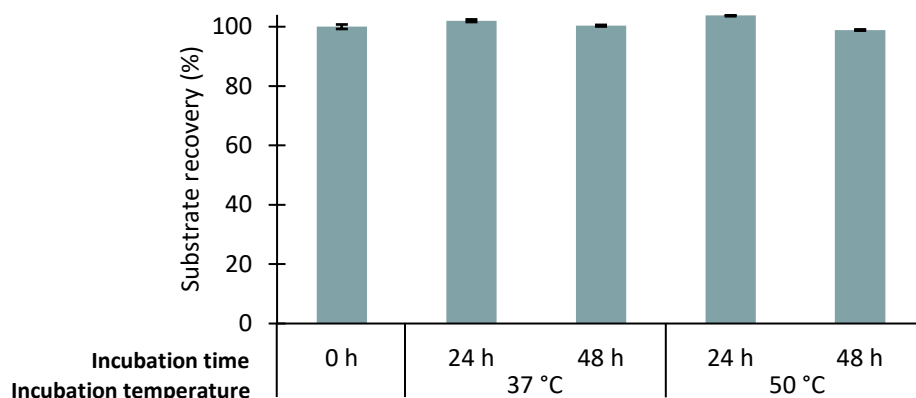

**Fig. S2** Recovery of an aromatic reference compound TMCA-2 (*trans*-TMCA) tested at two temperatures (37 °C and 50 °C), up to 48 incubation hours. The recovery was calculated and reported in relative to a UV280 nm peak area of TMCA without incubation. The peak area of TMCA-1 was significantly smaller than TMCA-2, with less than 2.5% of the sum of the peak area of both isomers in all conditions. Therefore, the recovery was shown based on TMCA-2 only.

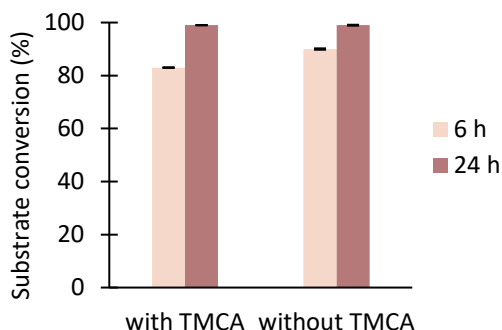

**Fig. S3** Comparison of the conversion (%) of **1** by RePT in the presence of DMAPP, with or without 0.16 mM TMCA, after incubation for 6 and 24 hours at 37 °C. The concentration of RePT used in this experiment was 0.1 mg/mL, ten times lower than the concentration used to characterize the substrate scope of RePT.

|            | 10  | 20                          | 30             | 40                           | 50             | 60                          | 70                           | 80                           | 90                          | 100                          |                           |                              |                        |         |                             |    |
|------------|-----|-----------------------------|----------------|------------------------------|----------------|-----------------------------|------------------------------|------------------------------|-----------------------------|------------------------------|---------------------------|------------------------------|------------------------|---------|-----------------------------|----|
| RePT       | 1   | MAGPSGHSTALNP               | ...            | HATDSASLLPPVAAPKATSLDN       | ...            | SVYHSLLTVLEAFADQDQL         | ...                          | FWMWETASIVAKLMESAGYDVESQRRYL | 80                          |                              |                           |                              |                        |         |                             |    |
| 7-DMATSafu | 1   | MSIGAEIDSLVP                | ...            | APPLNGTAAAGYPAKTQKESLNGDF    | DAHGDLSLAQLT   | PVDTVAALTPAPASSTG           | FWMWETAGVMSKLAKKAIYPLTYHKYL  | 86                           |                             |                              |                           |                              |                        |         |                             |    |
| SiRd       | 1   | ...                         | ...            | MOTARLFGQLNLAAIANRDYEKKEQRLN | ...            | GWVLISLNQWLRLYDEDR          | ...                          | FWMWHTAPMLGRMML              | EGYDDQAKQHL                 | 75                           |                           |                              |                        |         |                             |    |
| TyrPT      | 1   | MGLSLPPLASPRLMHPHY          | ISVLYALFSSFLNL | IPDHAKSLGSGRAHFLP            | STWKQVGLY      | IRNVNHHGR                   | YWMHTGTGYVLLNLQEGAGYDVHDQART | 100                          |                             |                              |                           |                              |                        |         |                             |    |
| AcaPT      | 1   | ...                         | ...            | MIAAPY                       | ...            | ATSPISPILTKFPPTLFTPTKTVQ    | ...                          | SVFDILNSTLRIFENAEK           | ...                         | FWMWTSGRVLMSMFORLGYSVDIQIHM  | 77                        |                              |                        |         |                             |    |
| CdpG2PT    | 1   | ...                         | ...            | MANRVSNDP                    | ...            | DAVSQNEVQAQRKPI             | AQNTNDVDS                    | ...                          | TPYRILITQFLTLPDEAK          | ...                          | GWEDSGSLSLRLLQVARYDVHDQAT | 80                           |                        |         |                             |    |
| DMATS1F1   | 1   | ...                         | ...            | ...                          | ...            | MLLQASQATQ                  | ...                          | SVWKTILNKLWLPPLSRDK          | ...                         | WWWTKLGPQITLITTEADYDLNREYAL  | 56                        |                              |                        |         |                             |    |
| FgaPT2     | 1   | ...                         | ...            | ...                          | ...            | MKKAANASSA                  | ...                          | EAYRVLSRAFRDFNDQDK           | ...                         | LWWWSTAPMFAKMLETANYTTPCQOYQL | 55                        |                              |                        |         |                             |    |
| CdpG3PT    | 1   | ...                         | ...            | ...                          | ...            | MTVSSSTAVEASAPCAEMHG        | ...                          | IPYRTLRSRMI                  | FANLDDQ                     | ...                          | GYWHLQIPVLGKMLVDGYSI      | 1HQQYEL                      | 76                     |         |                             |    |
| AnaPT      | 1   | ...                         | ...            | ...                          | ...            | MSPLS                       | ...                          | MQTDSDVGTAENKSLTNGTNSDQ      | ...                         | PKPVKLQKSLGLPTIEQE           | ...                       | GYWLNTAPYVNNLLIQCGYDVHQOYQL  | 68                     |         |                             |    |
| EchPT1     | 1   | ...                         | ...            | ...                          | ...            | ...                         | ...                          | MPSEVLTSYDYPHTDQE            | ...                         | AWWRDGTPLFR                  | LGKAGYDVHTQOYQL           | 46                           |                        |         |                             |    |
| BrePT      | 1   | ...                         | ...            | ...                          | ...            | MTAPELRAPAGHPQEPARS         | ...                          | SPAQALSSYHHPTSDQE            | ...                         | RYWQETGSLGRSFL               | LEAGGYDLHQOYQM            | 66                           |                        |         |                             |    |
| Notf       | 1   | ...                         | ...            | ...                          | ...            | MTAPELR                     | ...                          | VDTRAPEDAPKKEPSAQOPLPSP      | ...                         | SPAQALASYYHHPTSDQE           | ...                       | RWWEETGSLSRFL                | LEAGGYDLHQOYQM         | 74      |                             |    |
| CdpG2PT    | 1   | ...                         | ...            | ...                          | ...            | MAINSRGCLACKRHSQESAEYTNRVLT | ...                          | SPIEALARYWTPSTEHTT           | ...                         | QWQNDTAPL                    | SRFL                      | LEAGGYDVHDQOYQL              | 78                     |         |                             |    |
| CTpPT      | 1   | ...                         | ...            | ...                          | ...            | MTTYTILSKGSDRPQTSGDTPG      | ...                          | QPYDVLSKYLRFPFDIDQ           | ...                         | QWQNTAPMLKGL                 | LSQCKYVNHQOYQL            | 68                           |                        |         |                             |    |
| CdpNPPT    | 1   | ...                         | ...            | ...                          | ...            | MDGEMTASPPDI                | ...                          | SACDTSADVDEGTQSGSQSAP        | IPKD                        | ...                          | IAYHTLTKALLPFDIDQ         | ...                          | GHWHHVAPEMLAKMLVDGKYSI | 1HQQYEL | 83                          |    |
| FtmPT1     | 1   | ...                         | ...            | ...                          | ...            | ...                         | ...                          | MPPAPPDQKPCHQLOP             | ...                         | ...                          | ...                       | APYRALSEI                    | ILFGSDVEE              | ...     | RWWHSTPLISRLLLISNNYDVQOYKEL | 62 |
| XpT8       | 1   | ...                         | ...            | ...                          | ...            | MATDGMVLHKRSLSEGGST         | ...                          | ...                          | ...                         | ...                          | ...                       | QAWKVL                       | SQTLSPRGPDV            | ...     | AWWGLTGRHLVALDAAAPYIEKQOYEL | 62 |
| iacE       | 1   | ...                         | ...            | ...                          | ...            | MAISTPSNGSVHAKPL            | ...                          | ...                          | ...                         | ...                          | ...                       | PNLKEVNG                     | LETDSEDRA              | ...     | FWMWALSEPLASLLANHYTKVOLHJ   | 63 |
| AtaPT      | 1   | ...                         | ...            | ...                          | ...            | ...                         | ...                          | MLPPSSDKDP                   | ...                         | RPWQILSQALGFPNYDRE           | ...                       | LWWGNTAELTNRLVLEQOYSVHLQOYEL | 56                     |         |                             |    |
|            | 110 | 120                         | 130            | 140                          | 150            | 160                         | 170                          | 180                          | 190                         | 200                          |                           |                              |                        |         |                             |    |
| RePT       | 81  | LLYHAHILAAALGPK             | ...            | QTPCPSDRSASSPWKFSMTDDHTPIE   | ISWNLGAN       | ...                         | RSVLR                        | LSIEIPGFAGTSPDFPN            | QRPRLEALLQGLP               | ...                          | GID                       | 166                          |                        |         |                             |    |
| 7-DMATSafu | 97  | MLYHTHILPLLPGRPPLENSTHPSPSN | ...            | APWRSFLTDDFTPL               | PSWNVGNSEQAQST | IRLGE                       | IEPIGEAAGAADFP               | NQAAVTFQMHSYEATEV            | GAT                         | ...                          | 101                       |                              |                        |         |                             |    |
| SiRd       | 76  | LFYFYLVLPSLGR               | ...            | PSPEGYPT                     | ...            | TGWNFSMTDDYSPL              | ELSWDWHGA                    | EGESSVRS                     | IEPIGKAGYQADPDLNQMXYVLVDLGR | LPFAFHTHTL                   | 184                       |                              |                        |         |                             |    |
| TyrPT      | 101 | TFFGRS                      | IAHPLGVA       | ...                          | NEPGA          | ...                         | QRWSPFLMDDNNH                | ELSWDWHGA                    | KKSPTRFS                    | IEPIGVNAGQVQDQPNQADAF        | RKVLMOALP                 | NTD                          | 186                    |         |                             |    |
| AcaPT      | 78  | LFHFYRVLPFLMGPR             | ...            | PRDRANK                      | ...            | PAFKSYMOTDDHTPI             | ELSVIWNVD                    | ...                          | GATVRYAIEPI                 | DSAWSR                       | ...                       | KPAALRM                      | DELPRVLK               | GLD     | 158                         |    |
| CdpG2PT    | 81  | LFLYKLHILPFMGPR             | ...            | P                            | ...            | QRRRCYFEPYGAIE              | ELSVINFDEN                   | ...                          | KKEILRLVDLVS                | IPYCTKDNPSLDAFAAFSTGLQ       | IPSKVNY                   | 162                          |                        |         |                             |    |
| DMATS1F1   | 57  | LLLYRWVVPFMGPR              | ...            | PRSSV                        | ...            | APSKFSMTDDHSP               | IEVSWKVI                     | ...                          | SG                          | NKKPEIRYAVELSVPLAGSQDPFNQI   | ITRNLVYNLAKI              | IP                           | ELD                    | 142     |                             |    |
| FgaPT2     | 56  | ITYKECVISPLSGCY             | ...            | PTNSA                        | ...            | PRWLSILTRYGTTFE             | LSLNCSNS                     | ...                          | IVRYT                       | IEPIQHTGTDXDPDNLHAI          | WESLQHLHLP                | SLK                          | 137                    |         |                             |    |
| CdpG3PT    | 67  | SLFAHLILIPKLGPR             | ...            | PSGPR                        | ...            | DIYRCLLNLIGOPF              | ELSQNFQRL                    | ...                          | GSTARLAFEPETSYLASTAS        | ADPNRHAVHATLAE               | LRMTSGATSDV               | 151                          |                        |         |                             |    |
| AnaPT      | 77  | AFYHRHVLPLGPR               | ...            | IRSSAE                       | ...            | ANYISGSAEYPMELSVNYQAS       | ...                          | ...                          | KATVRLGCEPVGEFAGT           | SQDPMNQMTREVLGR              | LSRLDP                    | TFD                          | 161                    |         |                             |    |
| EchPT1     | 47  | VFFIKNILPSLGPY              | ...            | P                            | ...            | ARWRSTIPTGLPI               | ELSLNFQLN                    | ...                          | SRPLL                       | IGFEPFLSRFSGTQDPQNYKIAA      | ADLLNLQSLQLH              | QHEF                         | 1                      |         |                             |    |



|                              |     | 520                                                                                               | 530                                                                                               | 540 | 550 | 560 | 570 | 580 | 590 |  |
|------------------------------|-----|---------------------------------------------------------------------------------------------------|---------------------------------------------------------------------------------------------------|-----|-----|-----|-----|-----|-----|--|
| <i>RePT</i>                  | 416 | · P H H P L A · E S T S T H T Y I V F A F K K T T G V Y L T A Y · · ·                             | Y N P Q V Y A R K P K P S E K L E W T K D R L R G H R L · · ·                                     | 472 |     |     |     |     |     |  |
| <i>7-DMATS<sub>Afu</sub></i> | 435 | · P H H P L S · S S T G T H T L S F S Y K K Q K G V Y M T M Y · · ·                               | Y N L R V Y S T · · ·                                                                             | 472 |     |     |     |     |     |  |
| <i>SirD</i>                  | 407 | · S H R S L D · S G L G L H T Y I S C T F · K K T G L S V T S Y · · ·                             | F N P E I Y H P N R Y R Q · · ·                                                                   | 448 |     |     |     |     |     |  |
| <i>TyrPT</i>                 | 426 | · T H D A L · · Q Q R G L H T Y I A C S V Q S G G D L R V V S Y · · ·                             | M N A Q S E K F A T T · · ·                                                                       | 465 |     |     |     |     |     |  |
| <i>AcaPT</i>                 | 403 | · G R H R P L E · A R T G I H T Y V S L A I · K K S D F E V T S Y · · ·                           | F N P E A Y A P E R F P A P A R K · · ·                                                           | 446 |     |     |     |     |     |  |
| <i>CdpC7PT</i>               | 404 | · P D V D L S · Q S S R L Q T W I S F S Y T E Q G G A Y S T V Y · · ·                             | Y Q A A T R S T E F L A E · · ·                                                                   | 446 |     |     |     |     |     |  |
| <i>DMATS1<sub>Ff</sub></i>   | 376 | · P S G Q L D · Q A T G V Q T Y F A V A C · Q G E D L S L T S Y · · ·                             | L N P Q F Y A A F Q E P E R T · · ·                                                               | 419 |     |     |     |     |     |  |
| <i>FgaPT2</i>                | 385 | · P H A D H D · K L N Y L H A Y I S F S Y · R D R T P Y L S V Y · · ·                             | L Q S F E T G D W A V A N L S E S K V K C Q D A A C Q P T A L P P D L S K T G V Y Y S G L H · · · | 459 |     |     |     |     |     |  |
| <i>CdpC3PT</i>               | 392 | · P G E D L A · I A T D R Q A W L S I S Y T E E K G P Y L T M Y · · ·                             | Y H · · ·                                                                                         | 423 |     |     |     |     |     |  |
| <i>AnaPT</i>                 | 397 | · P C R N L A · E T T T V Q R W V A F S Y T E S G G A Y L T V Y · · ·                             | F H A V G G M K G N L · · ·                                                                       | 437 |     |     |     |     |     |  |
| <i>EchPT1</i>                | 373 | · P N Q N I S · Q T E R L Q A W I S F A Y N E R T G P Y L S V Y · · ·                             | Y Y S A E R P P W G S D Q V K · · ·                                                               | 417 |     |     |     |     |     |  |
| <i>BrePT</i>                 | 394 | · P D L D V S · R T S R L Q S W I S Y S Y T A K K G V Y M S V Y · · ·                             | F H S Q S T Y L W E E D · · ·                                                                     | 435 |     |     |     |     |     |  |
| <i>NotF</i>                  | 411 | · P D Q D I S · Q T T R L Q S W I S Y S Y T A K R G V Y M S V Y · · ·                             | Y H S Q S T Y L W E E D · · ·                                                                     | 452 |     |     |     |     |     |  |
| <i>CdpC2PT</i>               |     |                                                                                                   |                                                                                                   |     |     |     |     |     |     |  |
| <i>CTrpPT</i>                | 396 | · P H M D L N · D C T D L Q A W I S F S Y S D A T G P Y I T V Y · · ·                             | Y H · · ·                                                                                         | 427 |     |     |     |     |     |  |
| <i>CdpNPT</i>                | 406 | · E G K N L E · E A T R Y Q A W L S F A Y T K E K G P Y L S I Y · · ·                             | Y F W P E · · ·                                                                                   | 440 |     |     |     |     |     |  |
| <i>FtmPT1</i>                | 422 | · P D E D F E · K A A H L C A Y V S F A Y · K N G G A Y V T L Y N H S F N P V G D V S F P N · · · |                                                                                                   | 464 |     |     |     |     |     |  |
| <i>XptB</i>                  | 409 | · D Y R R L E · D S G G L L S F L S C Q F M E D G E L D L T S Y · · ·                             | F N P Q A F H S G R L T H R R A T R R R G D D R W · · ·                                           | 463 |     |     |     |     |     |  |
| <i>iacE</i>                  | 399 | · P K H N I T G K S V G T H T Y I S I T H T P K T G L Y M T M Y · · ·                             | L S P K L P E F Y Y · · ·                                                                         | 439 |     |     |     |     |     |  |
| <i>AtaPT</i>                 | 384 | · P N V D I S · Q T K N V H R W L G V A Y S E T K G P S M N I Y · · ·                             | Y D V V A G N V A R V · · ·                                                                       | 424 |     |     |     |     |     |  |

**Fig. S4** Multiple sequence alignment analysis of RePT and 19 characterized DMATs. The conserved key residues for prenyl donor binding are highlighted in blue, the conserved tyrosine residues for stabilizing the dimethylallyl carbocation intermediates in pink, and a key glutamate residue for binding the acceptor substrate in grey. Accession numbers of 20 DMATs are as follow: RePT (XP\_013322739.1), 7-DMATS<sub>Afu</sub> (XP\_754328.2), SirD (XP\_003842411.1), TyrPT (XP\_001396322.1), AcaPT (QHD39928.1), CdpC7PT (XP\_001213396.1), DMATS1<sub>Ff</sub> (XP\_023436063.1), FgaPT2 (AAX08549.1), CdpC3PT (XP\_001259405.1), AnaPT (XP\_001258078.1), EchPT1 (ATP76206.1), BrePT (AFM09725.1), NotF (ADM34132.1), CdpC2PT (XP\_001267443.1), CTrpPT (ADI60056.1), CdpNPT (ABR14712.1), FtmPT1 (AAX56314.1), XptB (P0DP82.1), iacE (A0A1J0HSL6.1), and AtaPT (AMB20850.1).

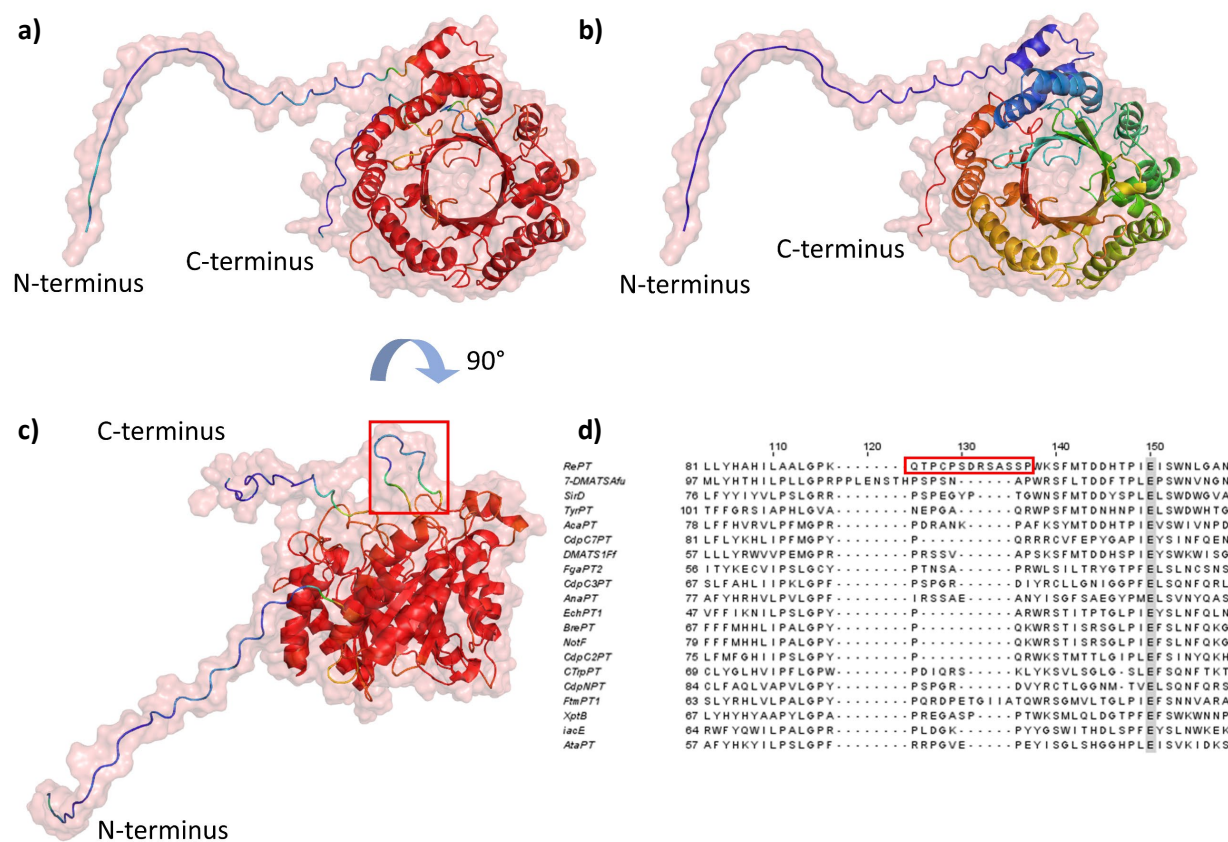

**Fig. S5** A structural model of untagged RePT acquired using AlphaFold2. The model is colored according to **a)** the predicted local distance difference test (pLDDT) score of the AlphaFold2 model, with high and low confidence scores shown in **red** and **blue**, respectively, and **b)** the order of amino acids in which the *N*-terminus is colored **blue** and *C*-terminus is colored **red**. **c)** the view of **a)** with 90° rotation on X-axis to display the area with low pLDDT score (in the red rectangle). **d)** According to the multiple sequence alignment, the sequences in this area vary in amino acid composition and length among DMATSSs. The structural models presented here were generated in PyMOL.

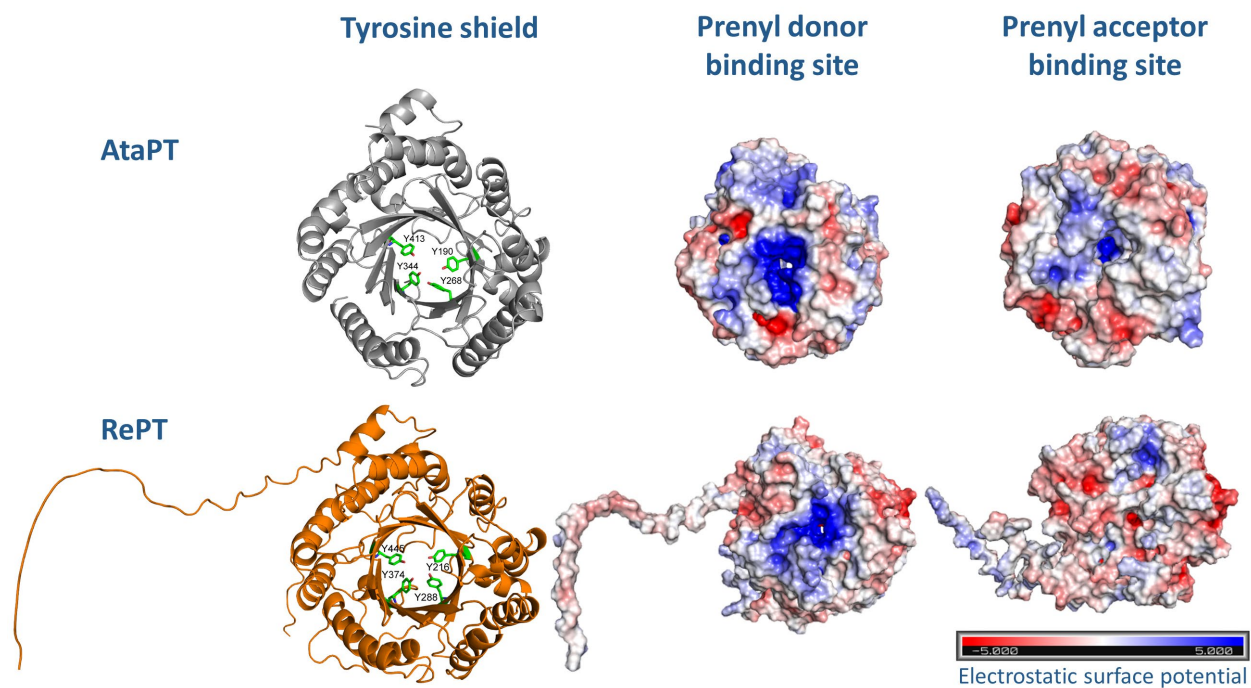

**Fig. S6** Comparison of the structural models of *N*-terminal truncated AtaPT in the apo state (PDB: 5KCG) and the untagged RePT acquired using AlphaFold2. Residues in green represent the four highly conserved tyrosine residues (also known as the tyrosine shield). The electrostatic surface (positively charged in **blue**, negatively charged in **red**) of AtaPT displays a prenyl donor binding site (highly positively charged region) and an aromatic acceptor binding pocket (a more hydrophobic region) as reported by Chen et al. (2017).

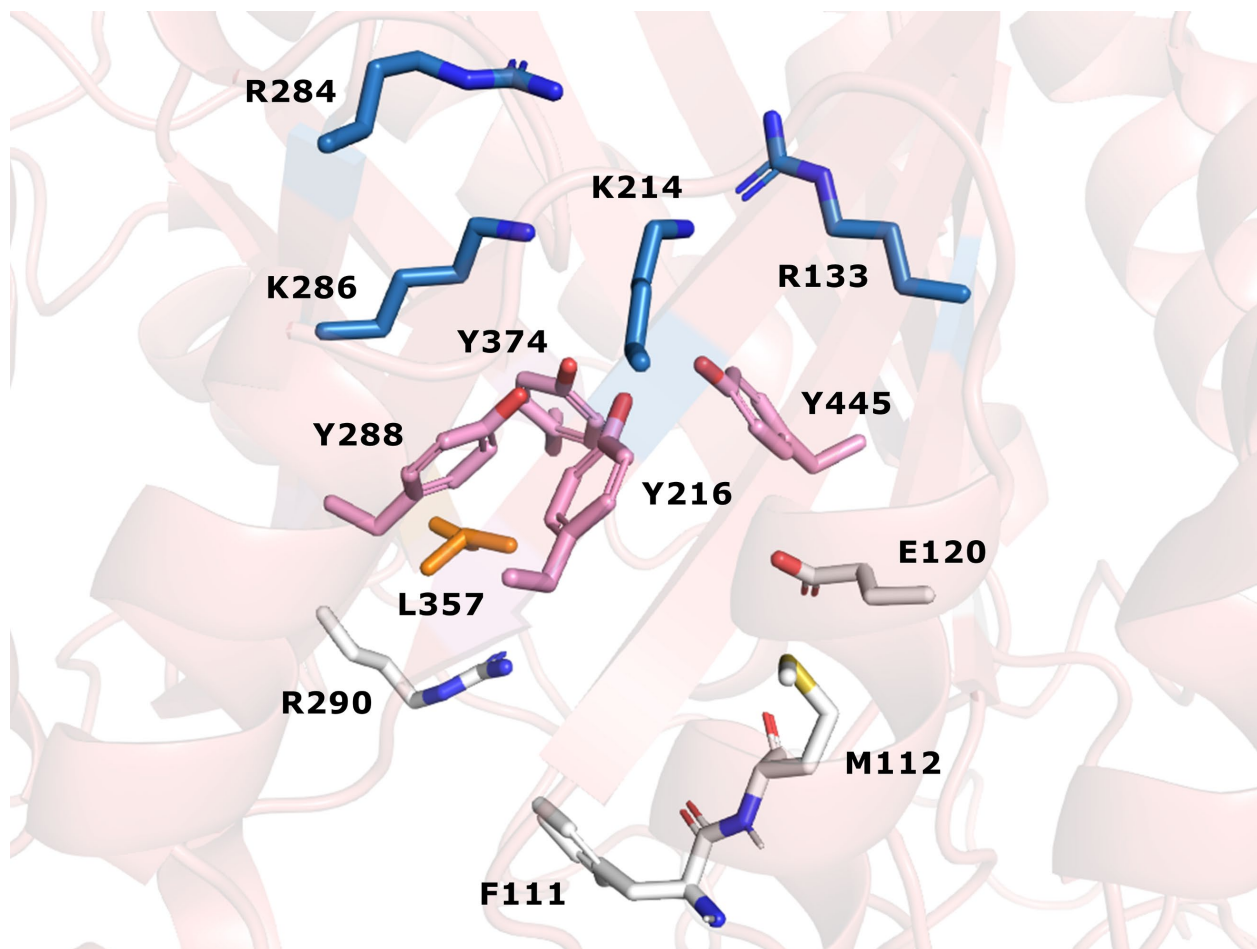

**Fig. S7** An expanded view of the active site architecture of RePT using a model acquired with AlphaFold2. Possible key residues are highlighted: prenyl-donor binding (blue), carbocation-intermediate stabilizer (pink), acceptor-binding (white), and a possible determinant for prenyl donor specificity (orange). The proposed roles of the residues are based on Metzger et al. (2009), Chen et al. (2017), Burkhardt et al. (2019), and Eaton et al. (2022).



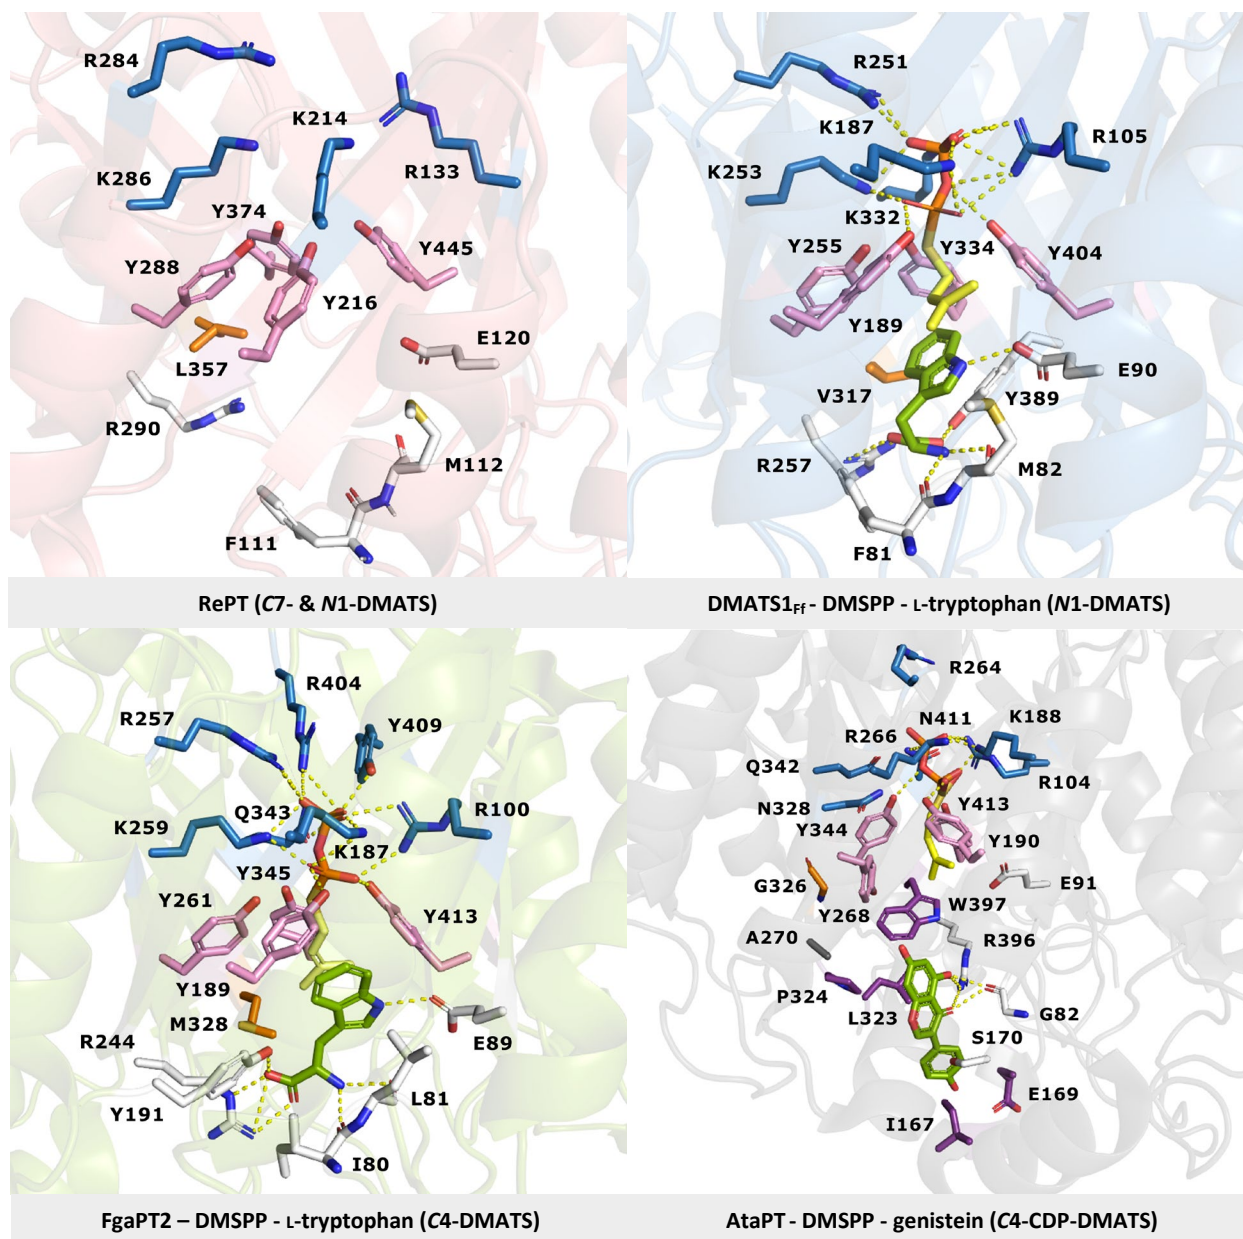

**Fig. S8** An expanded view of the active site architecture of four DMATs based on an AlphaFold2 model of RePT and crystal structures of DMATS1<sub>FF</sub> (PDB: 8DB0), FgaPT2 (PDB: 3I4X), and AtaPT (PDB: 5KDA) bound with a prenyl donor analogue (DMSPP) (in yellow) and an aromatic acceptor (in green). Key residues and analogues of the key residues identified from other relevant DMATs are highlighted: prenyl-donor binding (blue); carbocation-intermediate stabilizer (pink); acceptor-binding (white); non-ligand residues involved in hydrophobic interaction (purple); an analogue of amino-acid converting DMATs' arginine two positions downstream of the conserved RXXXY motif (R290 in RePT, R257 in DMATS1<sub>FF</sub>, R244 in FgaPT2), proposed to determine the preference of the enzyme between aromatic amino acid and cyclic dipeptide (CDP) (gray); a possible determinant for prenyl donor specificity (orange). Yellow dashed lines represent possible hydrogen bonds. The proposed roles of the residues in the crystal structures are based on Metzger et al. (2009), Fan and Li (2016), Chen et al. (2017), Burkhardt et al. (2019), and Eaton et al. (2022).

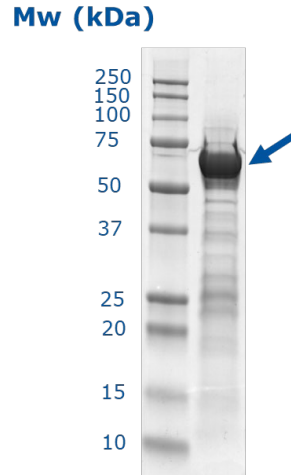

**Fig. S9** SDS-PAGE analysis of the purified His-SUMO-RePT.

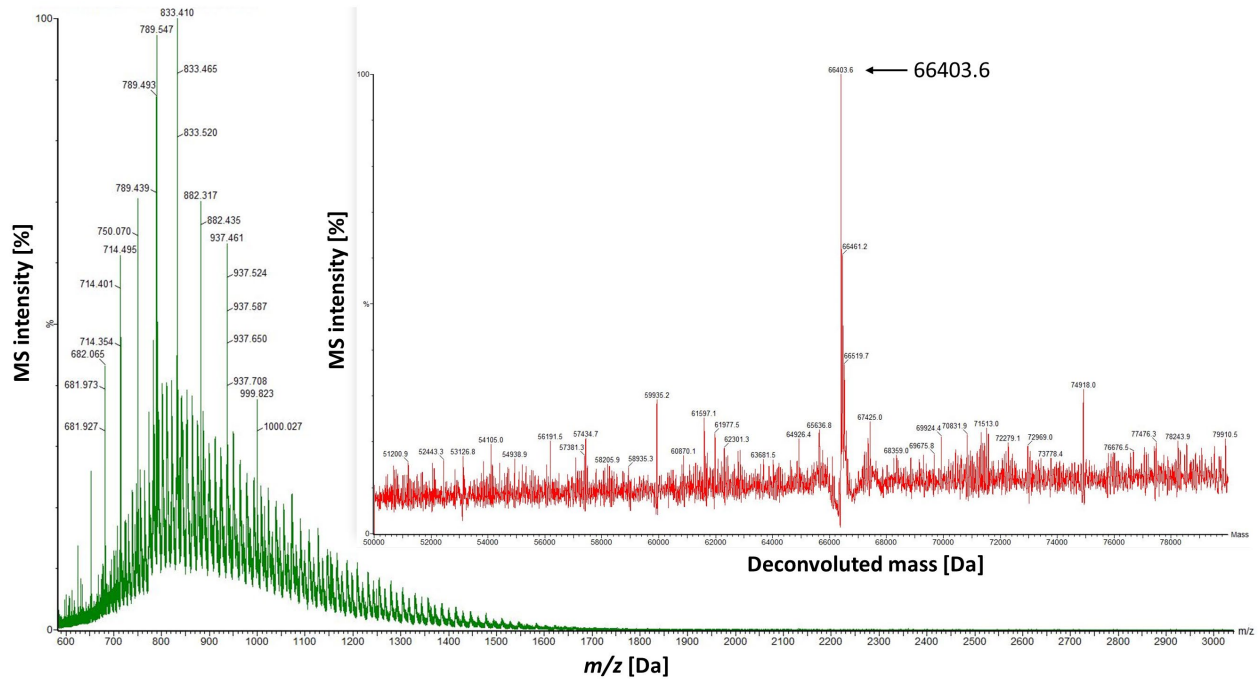

**Fig. S10** MS spectrum of intact His-SUMO-RePT (sequence shown in **Table S1**) before and after deconvolution using Maxent.

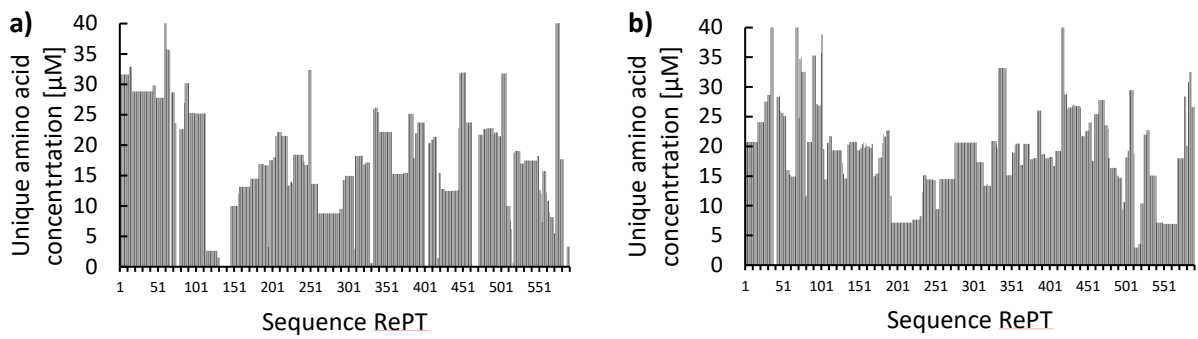

**Fig. S11** Quantitative coverage of amino acids after peptide analysis of His-SUMO-RePT digested with porcine trypsin and *Bacillus licheniformis* protease (BLP). The average (unique) amino acid concentrations were 19  $\mu\text{M}$  and 20  $\mu\text{M}$  in RePT hydrolysates by porcine trypsin and BLP, respectively.

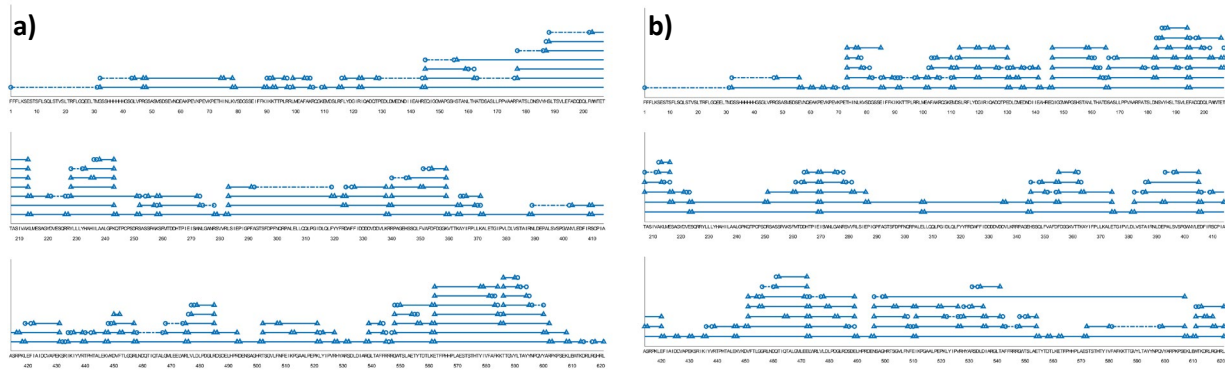

**Fig. S12** Peptides released upon digestion of RePT hydrolyzed by **a)** porcine trypsin and **b)** BLP. The dotted lines indicate expected peptides that were not identified

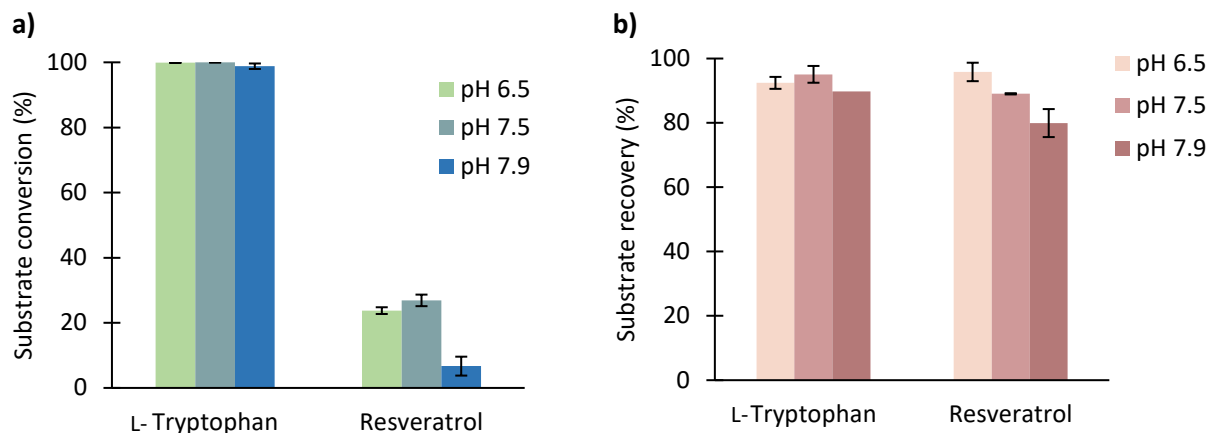

**Fig. S13 a)** Substrate conversion of L-tryptophan (**1**) and resveratrol (**8**) by RePT (1 mg/mL) in the presence of DMAPP at three pH values ranging from 6.5-7.9. The buffers used were 50 mM Bis-Tris/HCl (pH 6.5) and 50 mM Tris/HCl (pH 7.5 and 7.9) **b)** Substrate recovery after 24-hours incubation of **1** and **8** in the absence of RePT. The incubations were performed at a pH ranging from 6.5 to 7.9 in the presence of DMAPP. No clear pH optimum was observed when using **1**, but the highest conversion was observed at pH 7.5 when using **8**. The conversion of **8** was reduced to one-fourth at pH 7.9 compared to pH 7.5. This reduction could potentially be due to the lower stability of the substrate at high pH, as demonstrated by the lower substrate recovery at higher pH shown in **b)**. Due to the potential stability loss of other aromatic substrates at high pH as observed with **8**, pH 6.5 and 7.5 were then selected for further experiment to determine an optimum condition (**Fig. S11**). This experiment was performed without using TMCA as an internal standard.

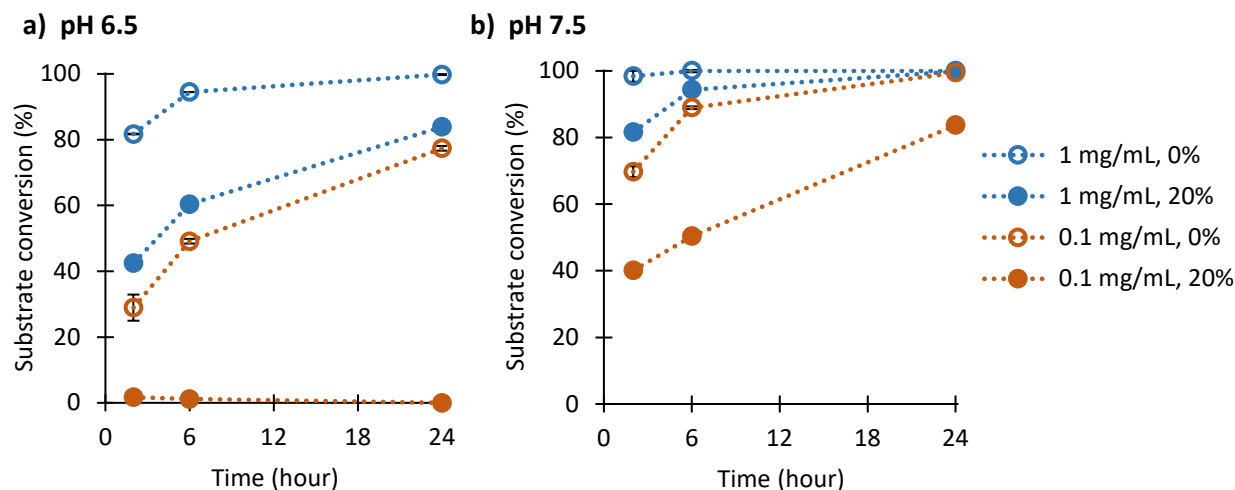

**Fig. S14** Substrate conversion of **1** by RePT in the presence of DMAPP throughout 24-hours incubation at different reaction conditions: RePT concentration 1 or 0.1 mg/mL, 0 % or 20 % (v/v) methanol, and the buffer **a)** 50 mM Bis-Tris/HCl buffer, pH 6.5 or **b)** 50 mM Tris/HCl, pH 7.5. At a lower enzyme concentration (0.1 mg/mL) or with 20 % (v/v) organic solvent, the conversion of **1** at pH 6.5 was lowered and was completely absent when all three suboptimal conditions were combined. Therefore, pH 7.5 was selected as an optimum condition for the enzymatic reaction.



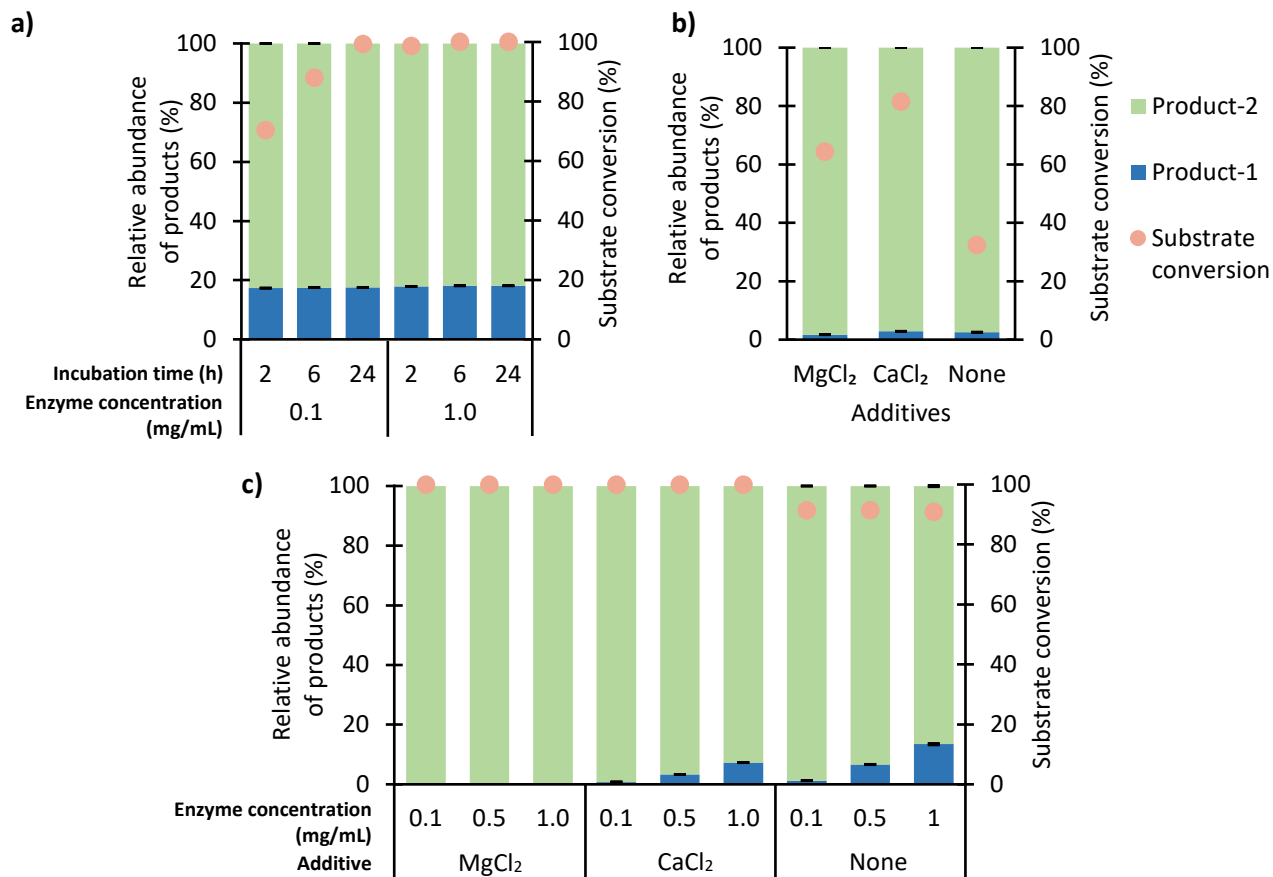

**Fig. S15** Substrate conversion (%) and relative abundance of prenylated products (%) by RePT in the presence of DMAPP and **a)** **1** when incubated for 2, 6, and 24 hours using 0.1 or 1.0 mg/mL RePT; **b)** **8** when incubated for 24 hours using 1.0 mg/mL RePT with 5 mM MgCl<sub>2</sub>, CaCl<sub>2</sub>, or no additives; and **c)** L-tyrosine (**2**) when incubated for 24 hours using 0.1, 0.5, or 1.0 mg/mL RePT with 5 mM MgCl<sub>2</sub>, CaCl<sub>2</sub>, or no additives.

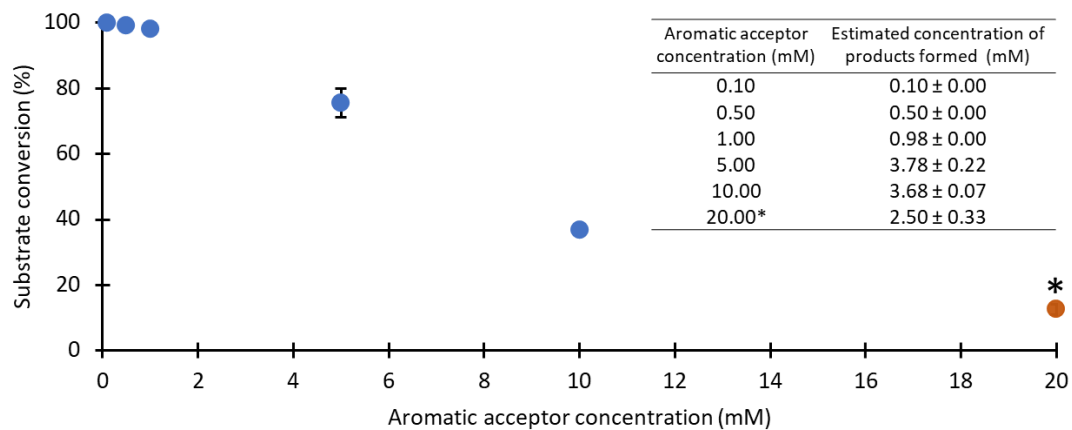

**Fig. S16** Substrate conversion of **1** converted by RePT when incubated for 24 hours using different concentrations of **1** (0.1–20 mM). A concentration of 0.1 mg/mL RePT was used. The molar ratio of DMAPP to **1** was 2:1, except for the sample at 20 mM of **1** (the orange point with an asterisk), in which the ratio was 1:1. The estimated concentrations of the products formed are shown in the table.

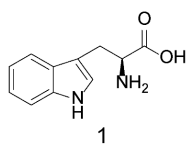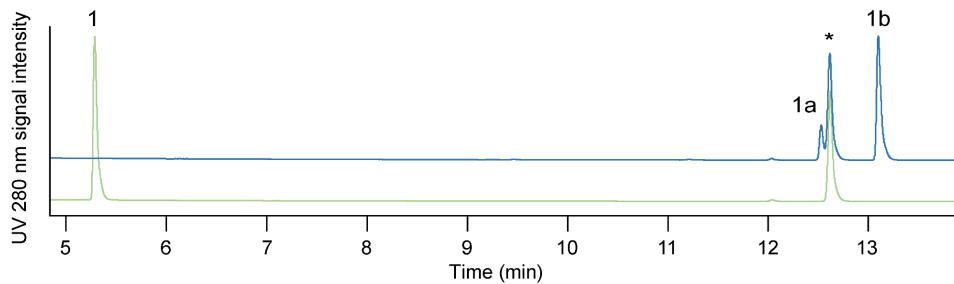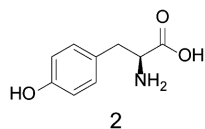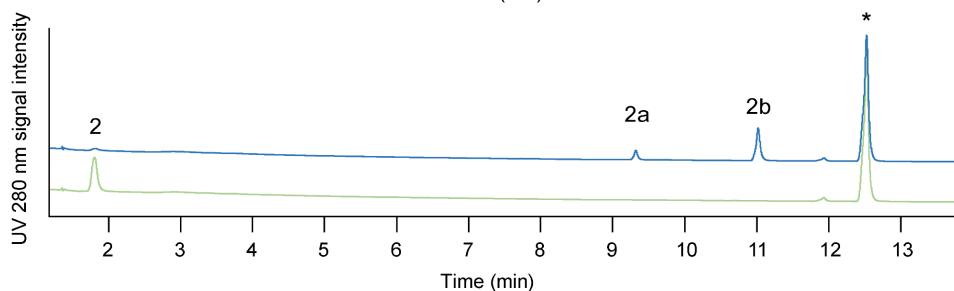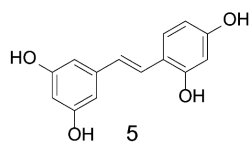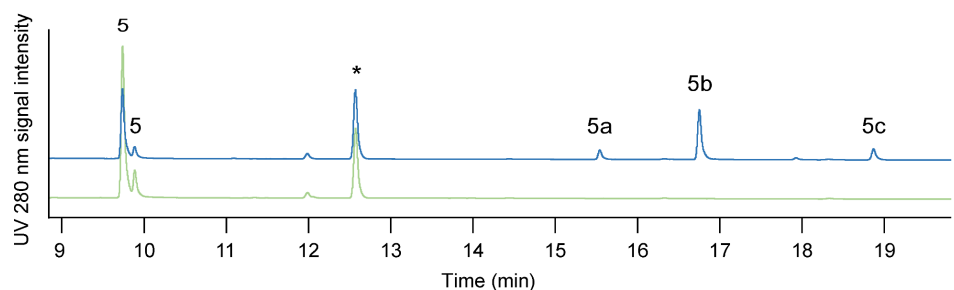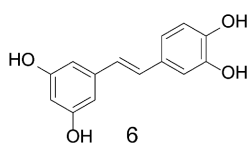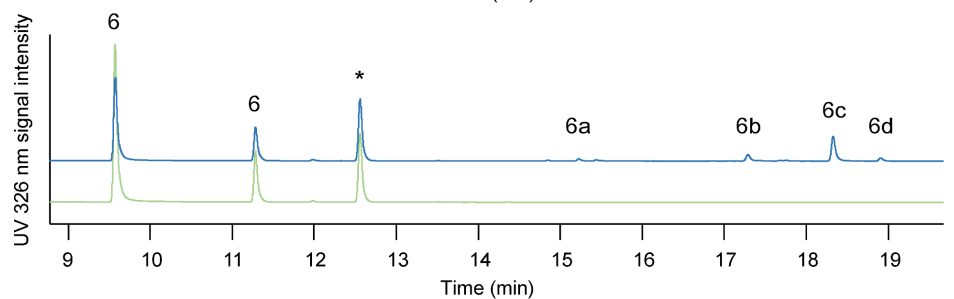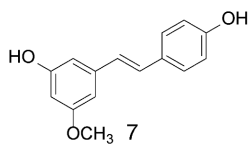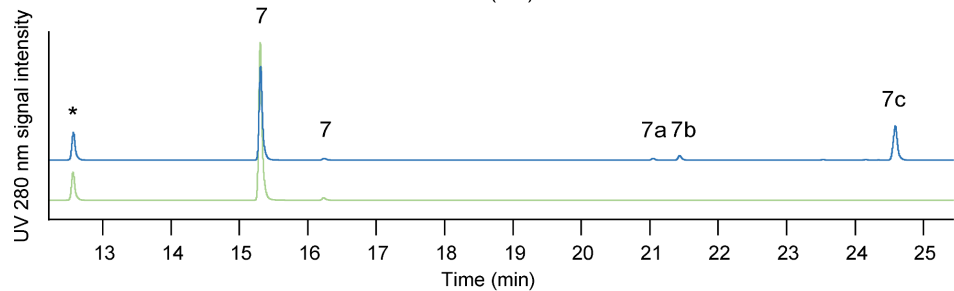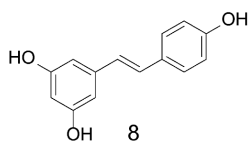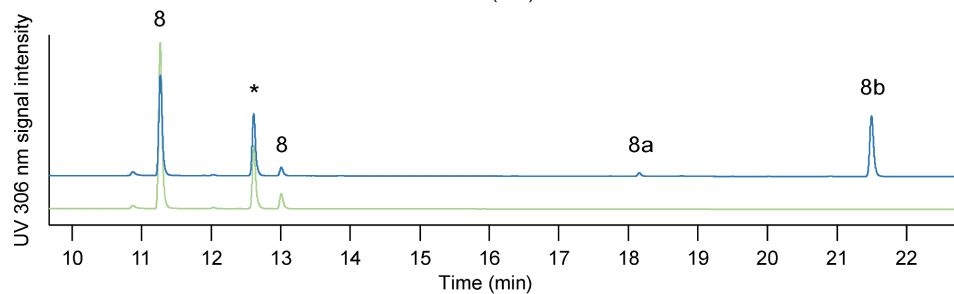

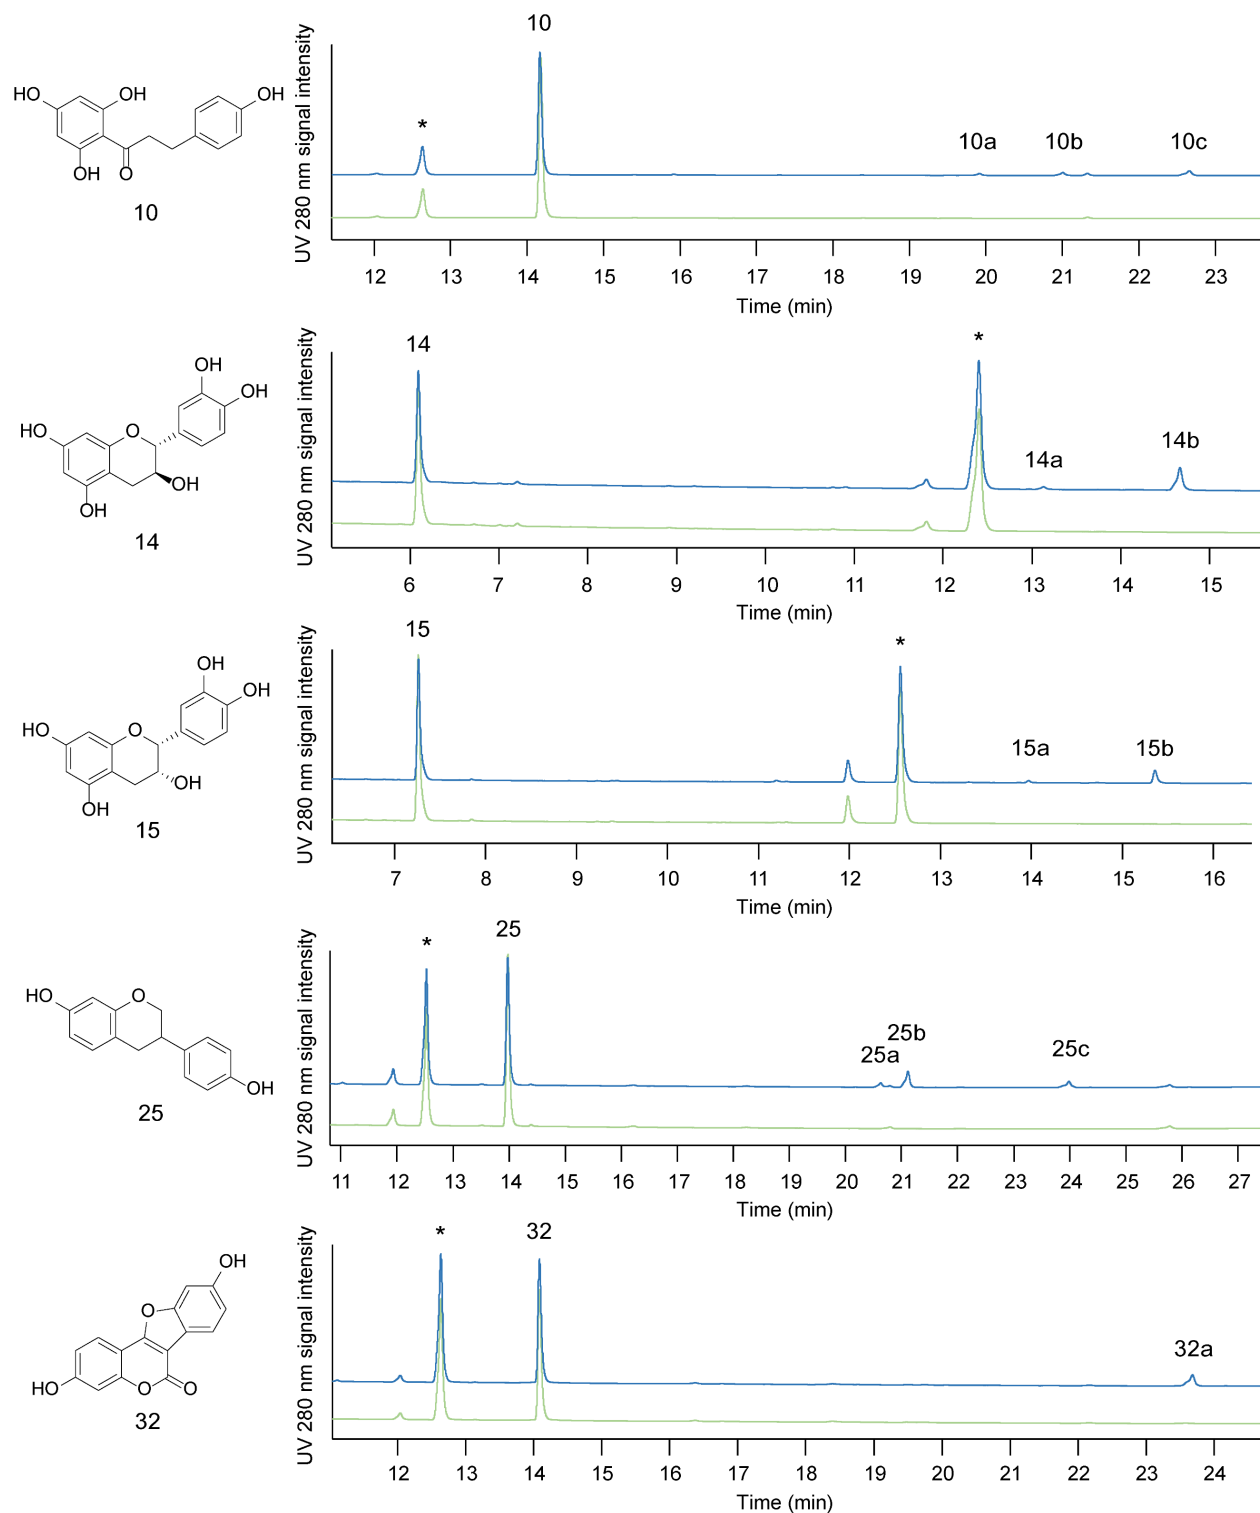

**Fig. S17** UHPLC-UV chromatograms of enzymatic reactions of RePT towards well-accepted substrates in the presence of DMAPP (in blue) and mixtures in the absence of RePT and DMAPP (blanks, in green). An asterisk indicates the main peak of TMCA, the internal standard used in the analysis. Peak numbers refer to compound numbers, detailed data for each peak are reported in **Table S3**.

**Table S3** Substrate conversion, UV and MS data, and the tentative identification of enzymatic products from RePT reactions in the presence of DMAPP and well-accepted substrates (higher than 10% conversion).

| No.              | Compound                     | Substrate conversion (%) | Rel. substrate or product abundance (%) <sup>a,b</sup> | Rt UV (min) | UV <sub>max</sub> <sup>c</sup> | [M-H] <sup>-</sup> | MS <sup>2</sup> NI (relative abundance) <sup>d,e</sup>                                                                                                                                      | [M+H] <sup>+</sup> | MS <sup>2</sup> PI (relative abundance) <sup>d,e</sup>            | (Tentative) prenylation position |
|------------------|------------------------------|--------------------------|--------------------------------------------------------|-------------|--------------------------------|--------------------|---------------------------------------------------------------------------------------------------------------------------------------------------------------------------------------------|--------------------|-------------------------------------------------------------------|----------------------------------|
| 1                | L-Tryptophan                 | 100 ± 0.0                | -                                                      | 5.30        | 278                            | 203                | 159 (100), 116 (40), 142 (15), 186 (11)                                                                                                                                                     | 205                | 188 (100)                                                         | -                                |
| 1a               | L-Tryptophan-PR1             |                          | 20                                                     | 12.53       | 286                            | 271                | 184 (100), 158 (30), 157 (14), 159 (11), 227 (6)                                                                                                                                            | 273                | 256 (100), <b>205 (7)</b>                                         | n.i. / reverse N1 (NMR)          |
| 1b               | L-Tryptophan-PR2             |                          | 80                                                     | 13.09       | 274                            | 271                | 184 (100), 227 (64), 210 (50), 254 (13), 185 (5)                                                                                                                                            | 273                | 256 (100)                                                         | n.i. / normal C7 (NMR)           |
| 2                | L-Tyrosine                   | 91.7 ± 0.3               | -                                                      | 1.80        | 274                            | 180                | 163 (100), 93 (14), 119 (13), 136 (11), 137 (5)                                                                                                                                             | 182                | 165 (100), 136 (27)                                               | -                                |
| 2a               | L-Tyrosine-PR1               |                          | 20                                                     | 9.32        | n.d.                           | 248                | 204 (100), 231 (72), 187 (60), 161 (51), 174 (13), 175 (5)                                                                                                                                  | 250                | 233 (100), <b>194 (43)</b> , 204 (11)                             | n.i.                             |
| 2b               | L-Tyrosine-PR2               |                          | 80                                                     | 11.02       | 274                            | 248                | 135 (100), 119 (32), 204 (27), 231 (27), <b>180 (22)</b> , 187 (20), 161 (20), <b>179 (7)</b>                                                                                               | 250                | 165 (100), <b>182 (13)</b> , 204 (5), 233 (5)                     | n.i. / normal O4 (NMR)           |
| 5 <sup>f,g</sup> | <i>trans</i> -Oxyresveratrol | 54.5 ± 0.4               | 75                                                     | 9.74        | <u>326</u> , 302               | 243                | 225 (100), 199 (33), 201 (33), 181 (21), 185 (19), 159 (17), 175 (16), 228 (14), 215 (11), 157 (8), 173 (6)                                                                                 | 245                | 227 (100), 226 (48), 135 (11), 199 (9), 161 (6), 203 (6), 209 (5) | -                                |
|                  | <i>cis</i> -Oxyresveratrol   |                          | 25                                                     | 9.88        | <u>318</u> , 286               | 243                | 225 (100), 201 (32), 199 (30), 185 (22), 175 (20), 181 (19), 159 (18), 228 (14), 215 (11), 157 (7), 173 (5)                                                                                 | 245                | n.d.                                                              | -                                |
| 5a               | Oxyresveratrol-PR1           |                          | 12                                                     | 15.54       | <u>326</u> , 286               | 311                | 293 (100), 187 (35), 267 (27), 123 (22), 175 (17), 249 (17), 135 (14), <b>243 (13)</b> , 296 (10), 269 (10), <b>242 (9)</b> , 225 (9), 283 (9), 185 (7), 201 (7), 253 (7), 241 (6), 227 (6) | 313                | n.d.                                                              | n.i.                             |

| No.                | Compound                  | Substrate conversion (%) | Rel. substrate or product abundance (%) <sup>a,b</sup> | Rt UV (min) | UV <sub>max</sub> <sup>c</sup> | [M-H] <sup>-</sup> | MS <sup>2</sup> NI (relative abundance) <sup>d,e</sup>                                                                                                                                                                     | [M+H] <sup>+</sup> | MS <sup>2</sup> PI (relative abundance) <sup>d,e</sup>                                                                 | (Tentative) prenylation position |
|--------------------|---------------------------|--------------------------|--------------------------------------------------------|-------------|--------------------------------|--------------------|----------------------------------------------------------------------------------------------------------------------------------------------------------------------------------------------------------------------------|--------------------|------------------------------------------------------------------------------------------------------------------------|----------------------------------|
| 5b                 | Oxyresveratrol-PR2        |                          | 71                                                     | 16.75       | <u>338</u> , 302               | 311                | 293 (100), 187 (37), 267 (29), 123 (22), 249 (18), 175 (17), <b>243 (14)</b> , 135 (14), 296 (11), 269 (11), <b>242 (10)</b> , 225 (9), 283 (9), 185 (8), 201 (8), 253 (7), 241 (6), 227 (6), 294 (6)                      | 313                | 239 (100), <b>257 (80)</b> , 294 (35), 295 (34), <b>245 (14)</b> , 227 (7), 256 (6), <b>258 (6)</b> , 123 (5), 238 (5) | n.i.                             |
| 5c                 | Oxyresveratrol-PR3        |                          | 17                                                     | 18.87       | 330                            | 311                | <b>242 (100)</b> , 241 (75), <b>243 (23)</b> , 293 (8)                                                                                                                                                                     | 313                | n.d.                                                                                                                   | O-prenyl                         |
| 6 <sup>f,g,h</sup> | <i>trans</i> -Piceatannol | 39.1 ± 1.6               | 79                                                     | 9.71        | 326                            | 243                | 255 (100), 201 (71), 199 (44), 175 (41), 200 (26), 243 (24), 215 (15), 159 (14), 173 (12), 185 (12), 228 (12), 214 (10), 181 (9), 198 (8), 197 (7), 157 (7), 226 (5)                                                       | 245                | n.d.                                                                                                                   | -                                |
|                    | <i>cis</i> -Piceatannol   |                          | 21                                                     | 11.35       | 262, <u>290</u>                | 243                | 225 (100), 201 (64), 199 (44), 175 (41), 200 (26), 243 (21), 159 (13), 215 (13), 228 (12), 185 (12), 173 (11), 214 (10), 198 (9), 181 (9), 197 (7), 157 (7), 226 (6)                                                       | 245                | n.d.                                                                                                                   | -                                |
| 6a                 | Piceatannol-PR1           |                          | 1                                                      | 15.23       | 334                            | 311                | <b>254 (100)</b> , 253 (33), 241 (29), <b>255 (21)</b> , 201 (18), 269 (17), 267 (15), <b>256(11)</b> , 212 (10), <b>242 (9)</b> , 268 (8), 227 (8), <b>243 (7)</b> , 293 (7), 240 (6), 187 (6), 123 (6), 189 (6), 109 (6) | n.d.               | n.d.                                                                                                                   | C-prenyl                         |
| 6b                 | Piceatannol-PR2           |                          | 14                                                     | 17.29       | 330                            | 311                | n.d.                                                                                                                                                                                                                       | n.d.               | n.d.                                                                                                                   | n.i.                             |
| 6c                 | Piceatannol-PR3           |                          | 83                                                     | 18.33       | 286, <u>326</u>                | 311                | <b>242 (100)</b> , <b>243 (45)</b> , 241(22), 267 (12), 224 (10), 293(6)                                                                                                                                                   | 313                | n.d.                                                                                                                   | O-prenyl                         |
| 6d                 | Piceatannol-PR4           |                          | 3                                                      | 18.91       | 314                            | 311                | <b>243 (100)</b> , <b>242 (47)</b> , 241 (10)                                                                                                                                                                              | 313                | <b>245 (100)</b> , 257 (8)                                                                                             | O-prenyl                         |

| No.              | Compound                   | Substrate conversion (%) | Rel. substrate or product abundance (%) <sup>a,b</sup> | Rt UV (min) | UV <sub>max</sub> <sup>c</sup> | [M-H] <sup>-</sup> | MS <sup>2</sup> NI (relative abundance) <sup>d,e</sup>                                                         | [M+H] <sup>+</sup> | MS <sup>2</sup> PI (relative abundance) <sup>d,e</sup>                                                                                                                                                                                                                 | (Tentative) prenylation position |
|------------------|----------------------------|--------------------------|--------------------------------------------------------|-------------|--------------------------------|--------------------|----------------------------------------------------------------------------------------------------------------|--------------------|------------------------------------------------------------------------------------------------------------------------------------------------------------------------------------------------------------------------------------------------------------------------|----------------------------------|
| 7 <sup>f,g</sup> | <i>trans</i> -Pinostilbene | 38.8 ± 0.5               | 94                                                     | 15.31       | 306-318                        | 241                | 225 (100), 226 (88)                                                                                            | 243                | 149 (100), 225 (65), 133 (42), 211 (39), 121 (25), 119 (24), 147 (18), 197(16), 159 (13), 210 (12), 183 (11), 145 (11), 135 (11), 224 (9), 226 (9), 215 (8), 123 (8), 213 (8), 193 (7), 227 (7), 107 (7), 105 (7), 157 (6), 201 (6), 212 (6), 91 (6), 125 (6), 207 (5) | -                                |
|                  | <i>cis</i> -Pinostilbene   |                          | 6                                                      | 16.23       | 286                            | 241                | 225 (100), 226 (86)                                                                                            | 243                | n.d.                                                                                                                                                                                                                                                                   | -                                |
| 7a               | Pinostilbene-PR1           |                          | 5                                                      | 21.05       | 330                            | 309                | n.d.                                                                                                           | 311                | n.d.                                                                                                                                                                                                                                                                   | n.i.                             |
| 7b               | Pinostilbene-PR2           |                          | 8                                                      | 21.44       | 326                            | 309                | <b>254 (100)</b> , 293 (31), 294 (24), 255 (12), 309 (10), 310 (9), <b>253 (7)</b> , 251 (6)                   | 311                | n.d.                                                                                                                                                                                                                                                                   | C-prenyl                         |
| 7c               | Pinostilbene-PR3           |                          | 84                                                     | 24.59       | 306-318                        | 309                | n.d.                                                                                                           | 311                | <b>243 (100)</b>                                                                                                                                                                                                                                                       | O-prenyl                         |
| 8 <sup>f,i</sup> | <i>trans</i> -Resveratrol  | 36.7 ± 0.5               | 77                                                     | 11.27       | 306                            | 227                | 185 (100), 183 (42), 159 (34), 157 (28), 143 (14), 227 (14), 212 (5)                                           | 229                | 135 (100), 211 (54), 119 (21), 107 (19), 210 (16), 183 (12), 227 (7), 91 (6), 199 (6), 212 (6), 111 (5), 187 (5)                                                                                                                                                       | -                                |
|                  | <i>cis</i> -Resveratrol    |                          | 23                                                     | 13.01       | 290                            | 227                | 185 (100), 183 (45), 159 (38), 157 (29), 143 (14), 227 (14)                                                    | 229                | n.d.                                                                                                                                                                                                                                                                   | -                                |
| 8a               | Resveratrol-PR1            |                          | 5                                                      | 18.16       | 326                            | 295                | <b>240 (100)</b> , 251 (51), <b>239 (32)</b> , 253 (31), 225 (29), 295 (23), <b>226 (10)</b> , <b>227 (10)</b> | 297                | n.d.                                                                                                                                                                                                                                                                   | C-prenyl                         |

| No. | Compound            | Substrate conversion (%) | Rel. substrate or product abundance (%) <sup>a,b</sup> | Rt UV (min) | UV <sub>max</sub> <sup>c</sup> | [M-H] <sup>-</sup> | MS <sup>2</sup> NI (relative abundance) <sup>d,e</sup>                                                                    | [M+H] <sup>+</sup> | MS <sup>2</sup> PI (relative abundance) <sup>d,e</sup>                                | (Tentative) prenylation position              |
|-----|---------------------|--------------------------|--------------------------------------------------------|-------------|--------------------------------|--------------------|---------------------------------------------------------------------------------------------------------------------------|--------------------|---------------------------------------------------------------------------------------|-----------------------------------------------|
| 8b  | Resveratrol-PR2     |                          | 95                                                     | 21.50       | 306                            | n.d.               | n.d.                                                                                                                      | 297                | <b>229 (100), 241 (69)</b> , 191 (17), 223 (17)                                       | <i>O</i> -prenyl/<br><i>O</i> 4'-prenyl (NMR) |
| 10  | Phloretin           | 21.9 ± 0.1               | -                                                      | 14.18       | 286                            | 273                | 167 (100)                                                                                                                 | 275                | 107 (100), 149 (28), 169 (28), 127 (11)                                               | -                                             |
| 10a | Phloretin-PR1       |                          | 17                                                     | 19.92       | n.d.                           | 341                | 167 (100), 123 (9)                                                                                                        | 343                | 217 (100), 175 (78), 325 (7), 127 (6)                                                 | n.i.                                          |
| 10b | Phloretin-PR2       |                          | 28                                                     | 21.01       | 290                            | 341                | 235 (100), 193 (5), 191 (5)                                                                                               | 343                | <b>287 (100)</b>                                                                      | <i>C</i> -prenyl                              |
| 10c | Phloretin-PR3       |                          | 56                                                     | 22.66       | 286                            | 341                | <b>272 (100)</b> , 166 (5), <b>273 (5)</b>                                                                                | 343                | n.d.                                                                                  | <i>O</i> -prenyl                              |
| 14  | (+)-Catechin        | 23.3 ± 0.3               | -                                                      | 6.09        | 278                            | 289                | 245 (100), 205 (36), 179 (13), 203 (9), 231 (6), 247 (6)                                                                  | 291                | 123 (100), 139 (98), 165 (50), 273 (27), 151 (23), 147 (9)                            | -                                             |
| 14a | (+)-Catechin-PR1    |                          | 9                                                      | 13.13       | n.d.                           | 357                | <b>288 (100)</b> , <b>289 (48)</b> , 313 (21), 165 (20), 179 (9), 137 (8)                                                 | 359                | <b>291 (100)</b> , 191 (22), 273 (19), 303 (16), 139 (15), 341 (12), 207 (5), 123 (5) | <i>O</i> -prenyl                              |
| 14b | (+)-Catechin-PR2    |                          | 90                                                     | 14.67       | n.d.                           | 357                | <b>288 (100)</b> , 150 (56), <b>289 (42)</b> , 313 (26), 166 (22), 137 (14), 179 (10), 165 (9), 226 (8), 273 (6), 270 (5) | 359                | <b>291 (100)</b> , 191 (21), 123 (18), 273 (17), 139 (13), 341 (6), 303 (5)           | <i>O</i> -prenyl                              |
| 15  | (-)-Epicatechin     | 14.6 ± 0.7               | -                                                      | 7.26        | 278                            | 289                | 245 (100), 205 (35), 179 (13), 203 (10), 231 (5), 247 (5)                                                                 | 291                | 123 (100), 139 (100), 165 (61), 273 (32), 151 (25), 147 (11)                          | -                                             |
| 15a | (-)-Epicatechin-PR1 |                          | 13                                                     | 13.97       | n.d.                           | 357                | n.d.                                                                                                                      | 359                | n.d.                                                                                  | n.i.                                          |
| 15b | (-)-Epicatechin-PR2 |                          | 87                                                     | 15.36       | 278                            | 357                | 150 (100), <b>288 (85)</b> , <b>289 (48)</b> , 166 (25), 137 (17), 313 (15), 165 (11), 226 (5), 179 (5)                   | 359                | <b>291 (100)</b> , 273 (16), 123 (15), 191 (12), 139 (9)                              | <i>O</i> -prenyl                              |
| 25  | (±)-Equol           | 25.1 ± 0.5               | -                                                      | 13.98       | 282                            | 241                | n.d.                                                                                                                      | 243                | 123 (100), 107 (48), 134 (34), 133 (14), 135 (11), 137 (7), 132 (7), 108 (5)          | -                                             |

| No. | Compound       | Substrate conversion (%) | Rel. substrate or product abundance (%) <sup>a,b</sup> | Rt UV (min) | UV <sub>max</sub> <sup>c</sup> | [M-H] <sup>-</sup> | MS <sup>2</sup> NI (relative abundance) <sup>d,e</sup> | [M+H] <sup>+</sup> | MS <sup>2</sup> PI (relative abundance) <sup>d,e</sup>                                                                                | (Tentative) prenylation position |
|-----|----------------|--------------------------|--------------------------------------------------------|-------------|--------------------------------|--------------------|--------------------------------------------------------|--------------------|---------------------------------------------------------------------------------------------------------------------------------------|----------------------------------|
| 25a | (±)-Equol-PR1  |                          | 16                                                     | 20.62       | n.d.                           | n.d.               | n.d.                                                   | 311                | n.d.                                                                                                                                  | n.i.                             |
| 25b | (±)-Equol-PR2  |                          | 55                                                     | 21.11       | n.d.                           | n.d.               | n.d.                                                   | 311                | n.d.                                                                                                                                  | n.i.                             |
| 25c | (±)-Equol-PR3  |                          | 29                                                     | 23.99       | n.d.                           | n.d.               | n.d.                                                   | 311                | <b>243 (100)</b> , 191 (59), 255 (51), 123 (36), 175 (30), 205 (24), 241 (23), 107 (13), 189 (12), 133 (7), 293 (6), 149 (6), 135 (5) | O-prenyl                         |
| 32  | Coumestrol     | 10.9 ± 0.4               | -                                                      | 14.08       | <u>342</u> , 306               | 267                | 267 (100), 239 (21), 268 (21), 266 (19)                | 269                | 241 (100), 197 (33), 225 (26), 242 (10), 269 (6), 268 (5)                                                                             | -                                |
| 32a | Coumestrol-PR1 |                          | 100                                                    | 23.68       | 346                            | 335                | <b><u>266 (100)</u></b>                                | 337                | <b>269 (100)</b>                                                                                                                      | O-prenyl                         |

<sup>a</sup> Relative abundance of substrate was calculated using the substrate blanks incubated at 37 °C for 24 hours. <sup>b</sup> Relative abundance of prenylated products, only prenylated products with relative product abundance ≥ 5% are shown, except for prenylated products of **6** for which the relative abundance of each product greatly changed when using different UV wavelengths for calculation. <sup>c</sup> The underlined UV-Vis wavelength corresponds to the main peak. <sup>d</sup> Only fragments with relative abundance ≥ 5% are reported. <sup>e</sup> Fragments with a neutral loss of 55 (in case of prenylated stilbenes), 56, 57, 68, or 69 u are displayed in *italic blue bold text*, *blue bold text*, underlined blue bold text, **black bold text**, and **underlined black bold text**, respectively. <sup>f</sup> Stilbenes may occur as *cis*- and *trans*- isomers, showing two substrate peaks. Substrate conversion was calculated using the combination of a peak area of both isomers and shown as one value. <sup>g</sup> A correction factor for UV signal intensity between *cis*- and *trans*- isomers was unknown for this substrate, therefore semi-quantification was performed without correction. <sup>h</sup> UV signal intensity at 326 nm was used to semi-quantify **6** and **6a-d** instead of UV 280 nm to avoid an error due to a co-eluting background peak. <sup>i</sup> UV signal intensity at 306 nm was used to semi-quantify *cis*- and *trans*- resveratrol. The intensity was corrected for a difference in the molecular extinction coefficients between the two isomers using the ratio of 3.426: 1 according to a known correction factor from Trela & Waterhouse (1996). Abbreviations: n.d. = not detected; n.i. = annotation guideline was not applicable to identify prenylation position or fragmentation pattern not available.



**Table S4** Substrate recovery (%) of prenyl acceptor substrates with > 10 % conversion by RePT after an incubation at 37 °C for 24 hours.

| No. | Compound        | Recovery (%)            |
|-----|-----------------|-------------------------|
| 1   | L-Tryptophan    | 100.0 ± 0.0             |
| 2   | L-Tyrosine      | 99.8 ± 0.1              |
| 5   | Oxyresveratrol  | 90.3 ± 0.2 <sup>a</sup> |
| 6   | Piceatannol     | 88.1 ± 1.8 <sup>a</sup> |
| 7   | Pinostilbene    | 99.9 ± 0.5 <sup>a</sup> |
| 8   | Resveratrol     | 102.2 ± 3.0             |
| 10  | Phloretin       | 103.5 ± 0.1             |
| 14  | (+)-Catechin    | 89.3 ± 0.2              |
| 15  | (-)-Epicatechin | 91.3 ± 0.5              |
| 25  | (±)-Equol       | 100 ± 0.1               |
| 32  | Coumestrol      | 76.7 ± 0.3              |

<sup>a</sup> The recovery was calculated by using the sum of the two isomers of the substrates without taking into account the difference in UV response between isomers.

**Table S5** NMR data of **1a** and **1b** in 70 % (v/v) methanol-d<sub>4</sub> in deuterium oxide, **2b** and **8b** in DMSO-d<sub>6</sub> ( $\delta$  in ppm,  $J$  in Hz).

| Position  | <b>1a</b>                                                                         |                                             | <b>1b</b>           |                                                                                   | <b>2b</b>                        |                     | <b>8b</b>                                                                          |                                  |                     |
|-----------|-----------------------------------------------------------------------------------|---------------------------------------------|---------------------|-----------------------------------------------------------------------------------|----------------------------------|---------------------|------------------------------------------------------------------------------------|----------------------------------|---------------------|
|           | 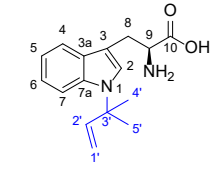 | $\delta_{\text{H}}$ , mult., $J^{\text{a}}$ | $\delta_{\text{C}}$ |  | $\delta_{\text{H}}$ , mult., $J$ | $\delta_{\text{C}}$ |  | $\delta_{\text{H}}$ , mult., $J$ | $\delta_{\text{C}}$ |
| 1         | -                                                                                 | -                                           | -                   | -                                                                                 | -                                | 129.6               | -                                                                                  | 139.6                            |                     |
| 2         | 7.43, s                                                                           | 126.5                                       | 7.28, s             | 125.5                                                                             | 7.15, d, 7.9                     | 130.8               | 6.40, d, 2.0                                                                       | 104.9                            |                     |
| 3         | -                                                                                 | 108.0                                       | -                   | 109.7                                                                             | 6.84, d, 7.6                     | 114.9               | -                                                                                  | 159.0                            |                     |
| 3a        | -                                                                                 | 130.4                                       | -                   | 128.4                                                                             | -                                | -                   | -                                                                                  | -                                |                     |
| 4         | 7.70, dd, 2.0, 6.9                                                                | 119.9                                       | 7.57, d, 7.8        | 117.4                                                                             | -                                | 157.6               | 6.13, t, 2.1                                                                       | 102.4                            |                     |
| 5         | 7.08, m, 6.8                                                                      | 120.3                                       | 7.05, t, 7.3        | 120.8                                                                             | 6.84, d, 7.6                     | 114.9               | -                                                                                  | 159.0                            |                     |
| 6         | 7.10, m, 6.8                                                                      | 122.1                                       | 6.96, d, 7.1        | 122.1                                                                             | 7.15, d, 7.9                     | 130.8               | 6.40, d, 2.0                                                                       | 104.9                            |                     |
| 7         | 7.51, d, 7.9                                                                      | 115.3                                       | -                   | 126.2                                                                             | 2.78, dd, 8.4, 14.3              | 36.5                | -                                                                                  | -                                |                     |
|           | -                                                                                 | -                                           | -                   | -                                                                                 | 3.06, dd, 4.4, 14.3              | -                   | -                                                                                  | -                                |                     |
| 7a        | -                                                                                 | 137.1                                       | -                   | 136.9                                                                             | -                                | -                   | -                                                                                  | -                                |                     |
| 8         | 3.51, dd, 4.9, 15.3                                                               | 28.1                                        | 3.23, dd, 8.7, 15.0 | 28.2                                                                              | 3.37, n.d. <sup>c</sup>          | 56.0 <sup>d</sup>   | -                                                                                  | -                                |                     |
|           | 3.21, dd, 4.3, 8.5                                                                |                                             | 3.52, dd, 4.3, 15.3 |                                                                                   | -                                | -                   | -                                                                                  | -                                |                     |
| 9         | 3.95, m, n.d. <sup>b</sup>                                                        | 56.7                                        | 3.96, dd, 4.1, 8.8  | 56.7                                                                              | -                                | -                   | -                                                                                  | -                                |                     |
| 10        | -                                                                                 | 174.8                                       | -                   | -                                                                                 | -                                | -                   | -                                                                                  | -                                |                     |
| 1'        | 5.21, d, 10.7                                                                     | 114.3                                       | 3.57, d, 7.4        | 30.5                                                                              | 4.49, d, 6.3                     | 64.6                | -                                                                                  | 158.6                            |                     |
|           | 5.16, d, 17.6                                                                     |                                             | -                   | -                                                                                 | -                                | -                   | -                                                                                  | -                                |                     |
| 2'        | 6.17, dd, 10.6, 17.7                                                              | 145.4                                       | 5.43, t, 7.4        | 122.9                                                                             | 5.42, t, 6.8                     | 120.6               | 7.50, d, 8.7                                                                       | 128.2                            |                     |
| 3'        | -                                                                                 | 60.4                                        | -                   | 134.7                                                                             | -                                | 137.3               | 6.92, d, 8.4                                                                       | 115.3                            |                     |
| 4'        | 1.76, s                                                                           | 28.2                                        | 1.76, s             | 18.1                                                                              | 1.70, s                          | 18.5                | -                                                                                  | 130.0                            |                     |
| 5'        | 1.76, s                                                                           | n.f.                                        | 1.76, s             | 26.1                                                                              | 1.74, s                          | 25.9                | 6.92, d, 8.4                                                                       | 115.3                            |                     |
| 6'        | -                                                                                 | -                                           | -                   | -                                                                                 | -                                | -                   | 7.50, d, 8.7                                                                       | 128.2                            |                     |
| $\alpha$  | -                                                                                 | -                                           | -                   | -                                                                                 | -                                | -                   | 6.89, d, 16.4                                                                      | 127.1                            |                     |
| $\alpha'$ | -                                                                                 | -                                           | -                   | -                                                                                 | -                                | -                   | 6.97, d, 16.4                                                                      | 128.0                            |                     |
| 1''       | -                                                                                 | -                                           | -                   | -                                                                                 | -                                | -                   | 4.54, d, 6.7                                                                       | 64.8                             |                     |
| 2''       | -                                                                                 | -                                           | -                   | -                                                                                 | -                                | -                   | 5.44, t, 6.6                                                                       | 120.4                            |                     |
| 3''       | -                                                                                 | -                                           | -                   | -                                                                                 | -                                | -                   | -                                                                                  | 137.5                            |                     |
| 4''       | -                                                                                 | -                                           | -                   | -                                                                                 | -                                | -                   | 1.72, s                                                                            | 18.5                             |                     |
| 5''       | -                                                                                 | -                                           | -                   | -                                                                                 | -                                | -                   | 1.75, s                                                                            | 25.9                             |                     |
| OH        | -                                                                                 | -                                           | -                   | -                                                                                 | -                                | -                   | 9.20, s                                                                            | -                                |                     |

<sup>a</sup>s: singlet, d: doublet, dd: doublet of doublets, t: triplet, m: multiplet; <sup>b</sup> overlapped with the peaks from **1b**; <sup>c</sup> overlapped with a residual solvent peak (H<sub>2</sub>O); <sup>d</sup> Peak not observed in the <sup>13</sup>C spectrum, but HMBC and/or HSQC correlations confirmed the chemical shift. Abbreviations: n.d. = no data due to peak overlapping, n.f. = not found

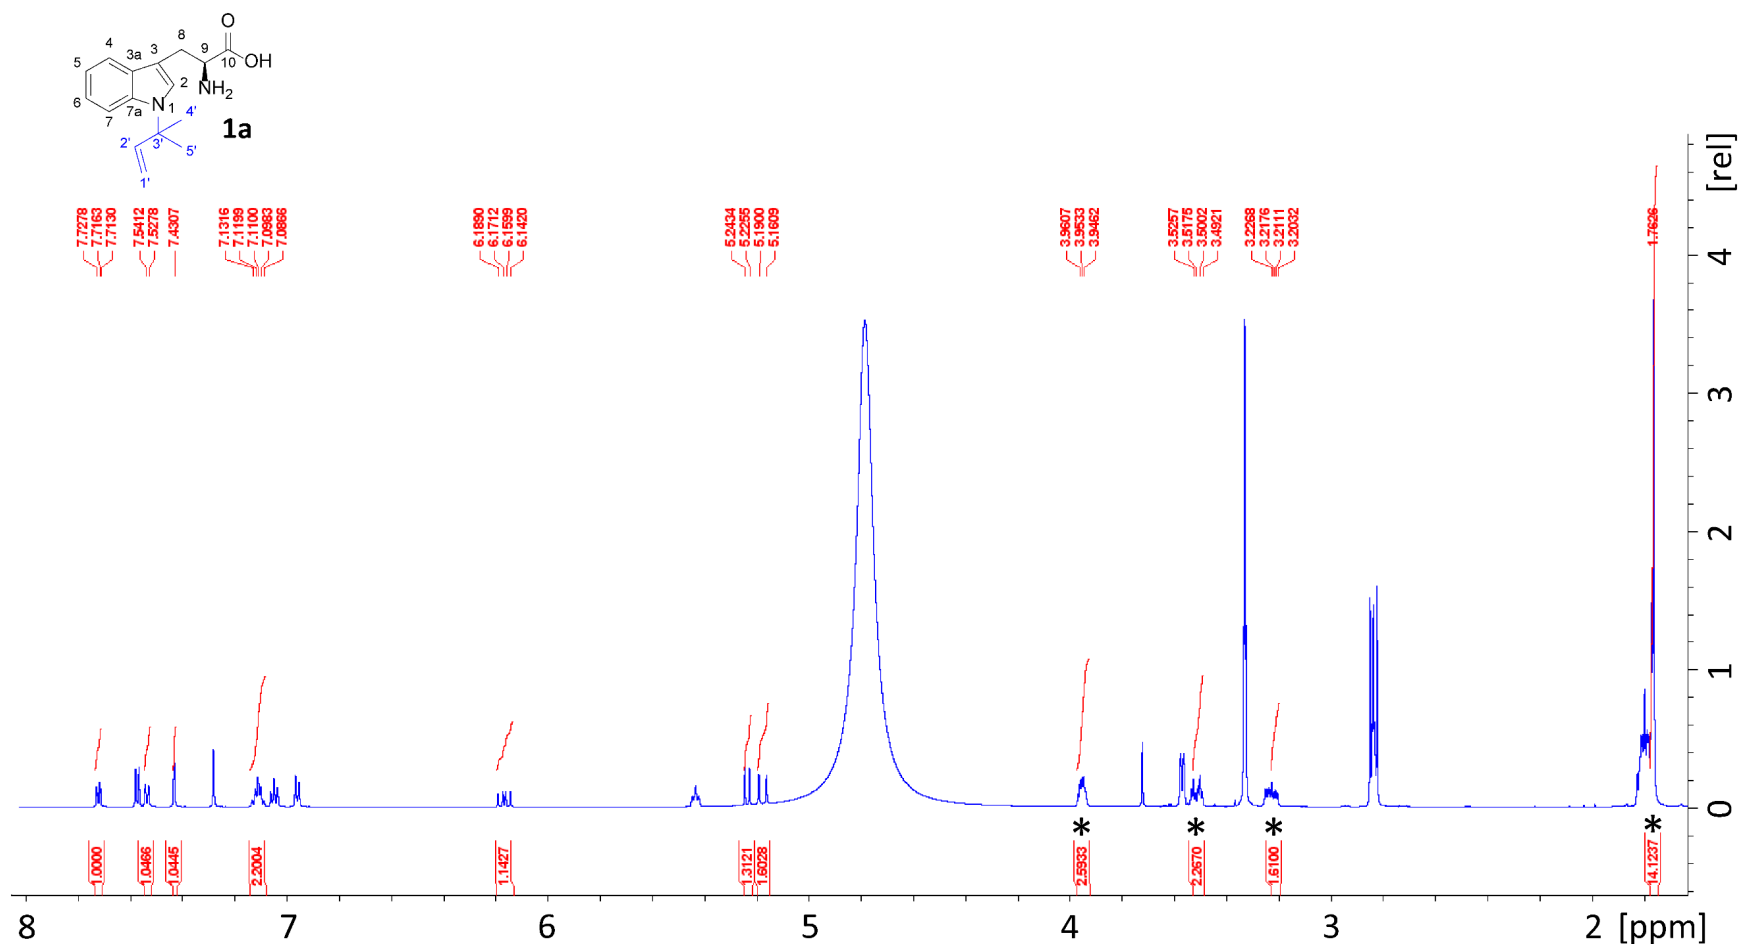

**Fig. S18**  $^1\text{H}$ -NMR spectrum (600 MHz) of **1a** recorded in a mixture of 70 % (v/v) methanol- $\text{d}_4$  and 30 % (v/v) deuterium oxide. Peaks with an asterisk were integrated including signals from both **1a** and **1b**, with a peak area ratio of **1a:1b** = 1:1.4.

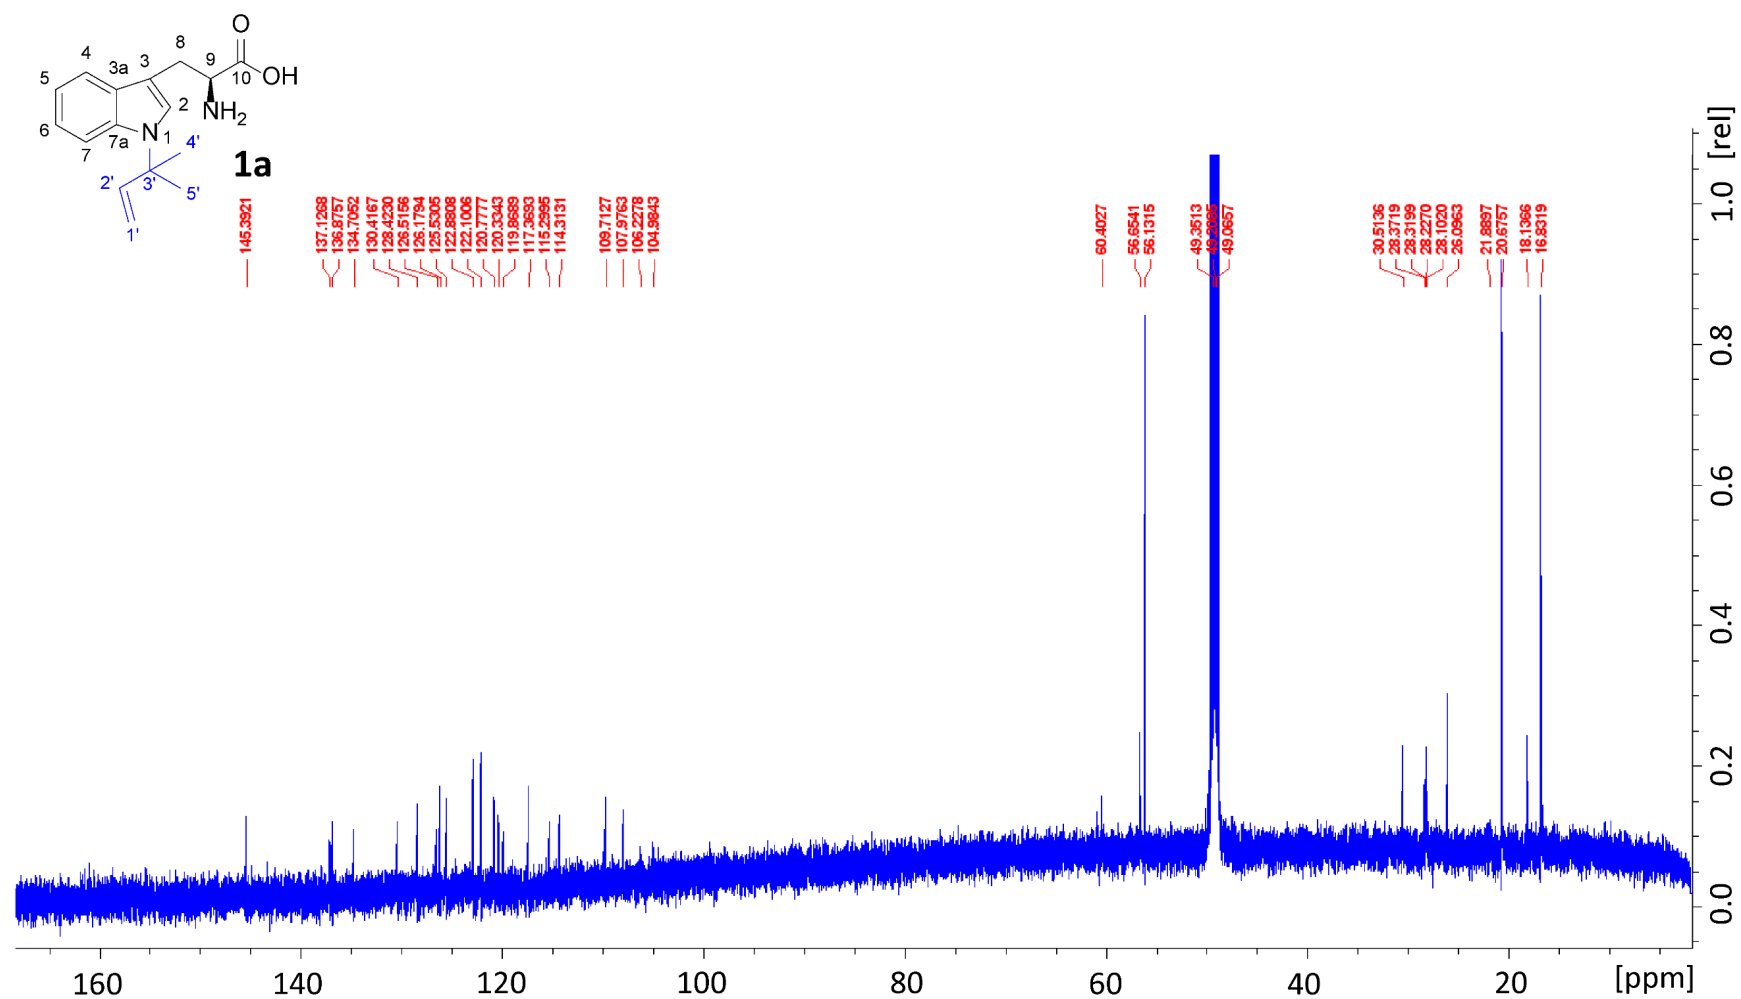

**Fig. S19** <sup>13</sup>C spectrum (150 MHz) of **1a** recorded in a mixture of 70 % (v/v) methanol-d<sub>4</sub> and 30 % (v/v) deuterium oxide.

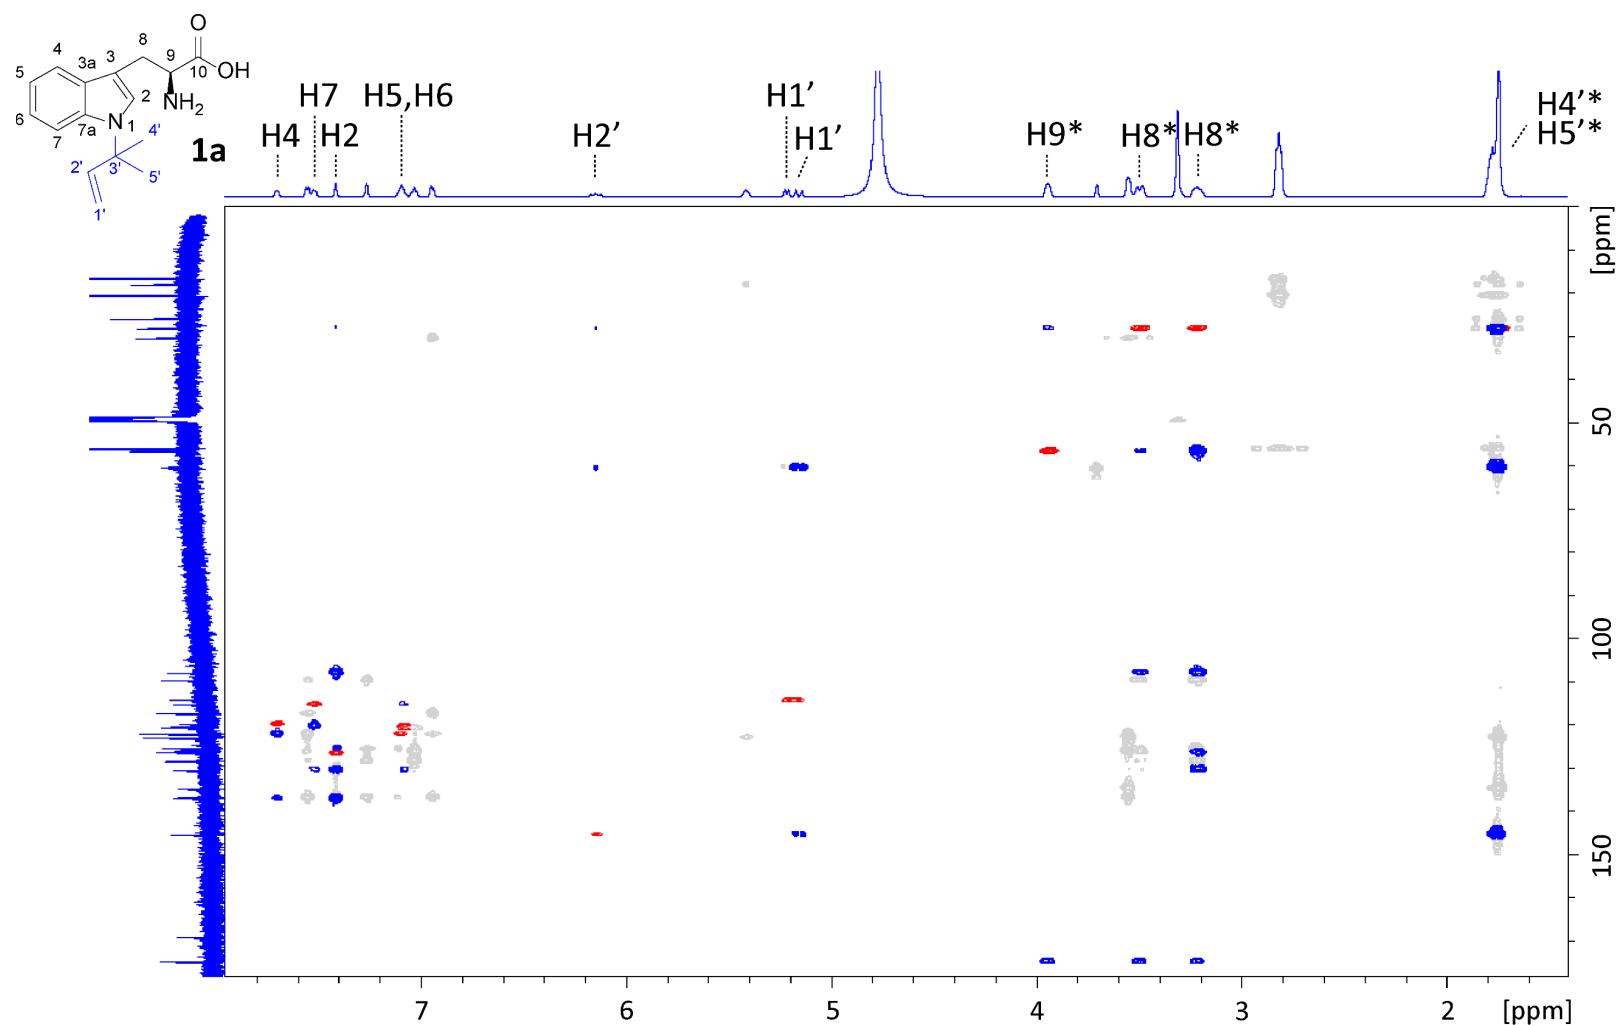

**Fig. S20**  $^1\text{H}$  (600 MHz)- $^{13}\text{C}$  (150 MHz) spectra and HSQC (red) and HMBC (blue) correlations of **1a** recorded in a mixture of 70 % (v/v) methanol- $\text{d}_4$  and 30 % (v/v) deuterium oxide. Peaks with an asterisk were integrated including signals from both **1a** and **1b**. Peaks of the impurities (correlations shown in grey) mostly came from the presence of **1b**, while a few peaks were from unidentified impurities. Due to the lack of peak splitting in the extrapolated  $^1\text{H}$  spectrum, a separate  $^1\text{H}$  spectrum (**Fig. S18**) was used to acquire accurate peak shapes for data interpretation.

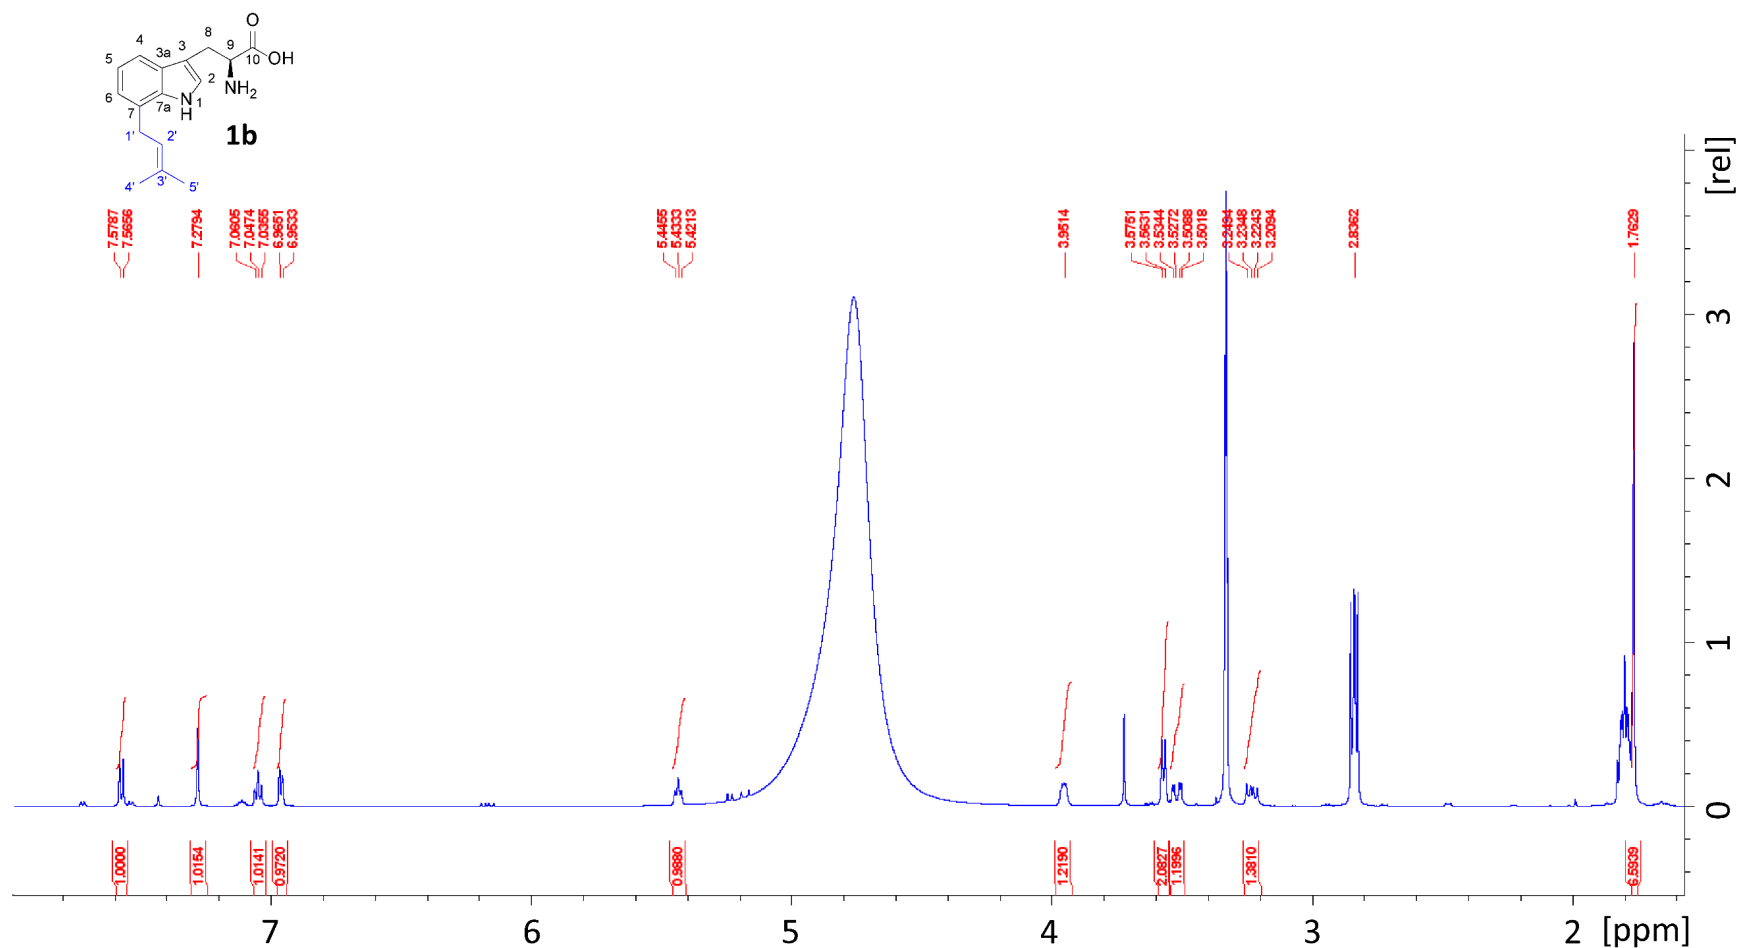

**Fig. S21**  $^1\text{H}$ -NMR spectrum (600 MHz) of **1b** recorded in a mixture of 70 % (v/v) methanol- $\text{d}_4$  and 30 % (v/v) deuterium oxide.

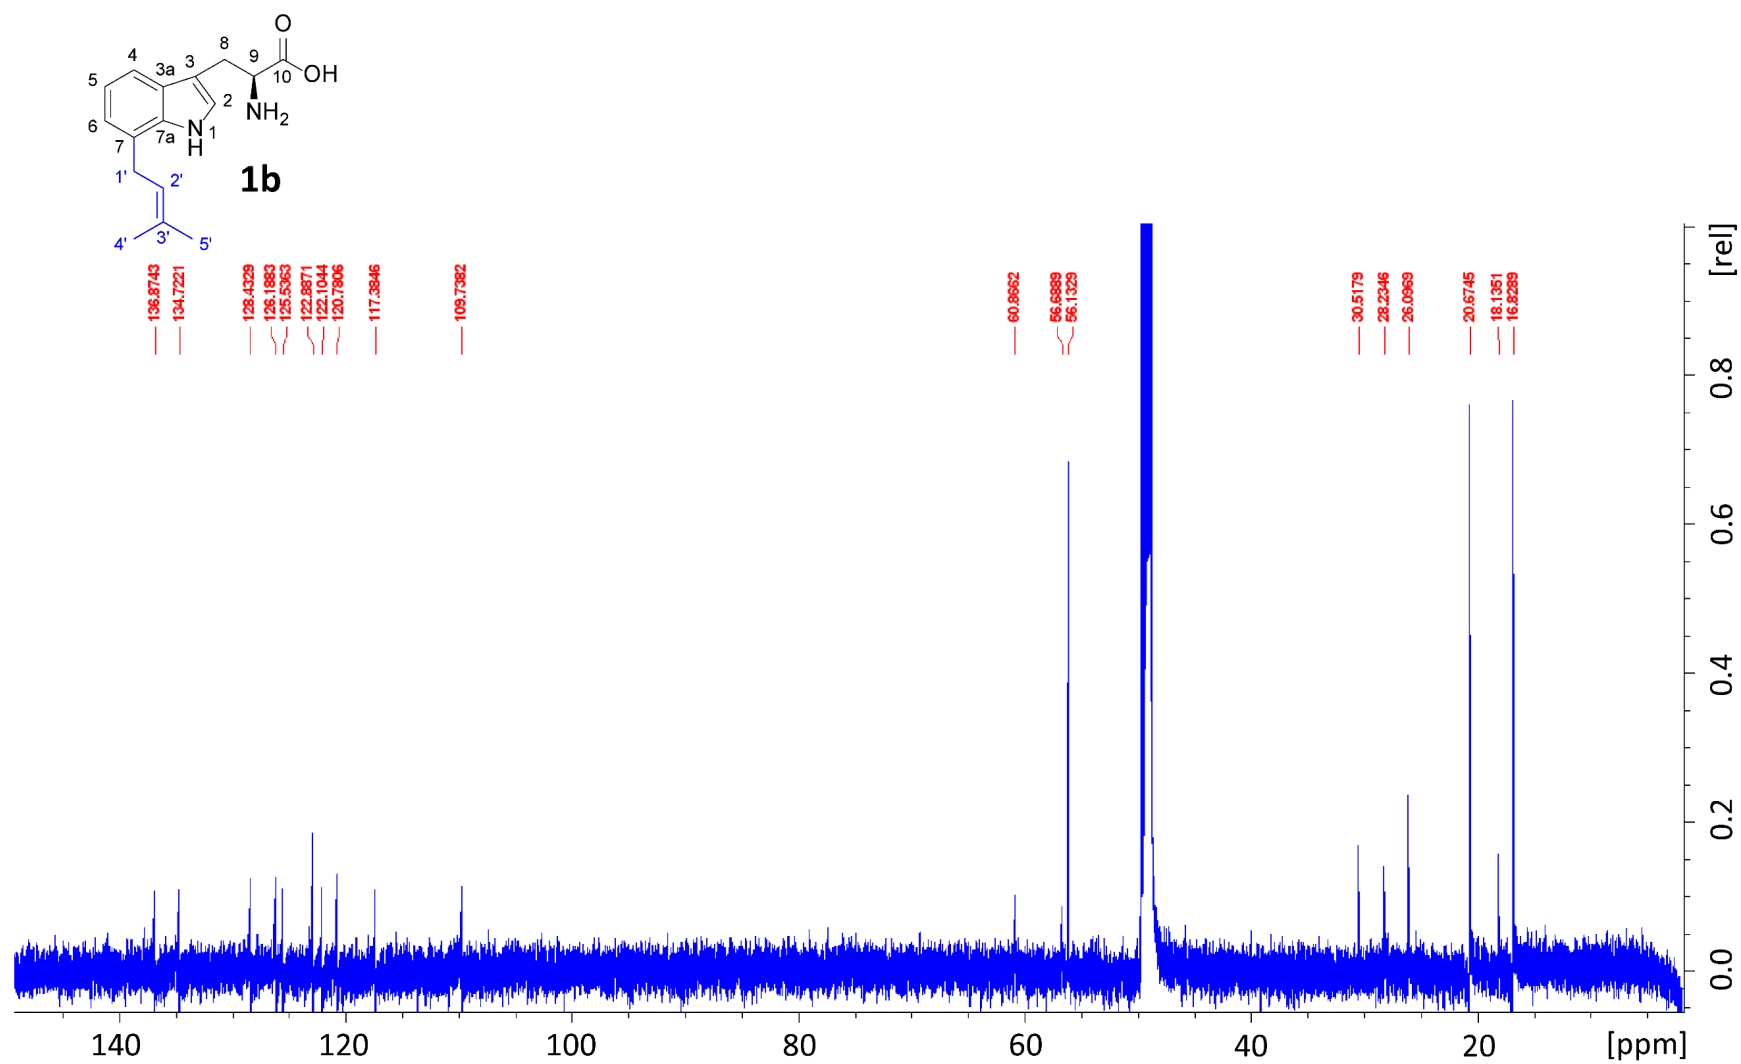

**Fig. S22**  $^{13}\text{C}$  spectrum (150 MHz) of **1b** recorded in a mixture of 70 % (v/v) methanol- $\text{d}_4$  and 30 % (v/v) deuterium oxide.

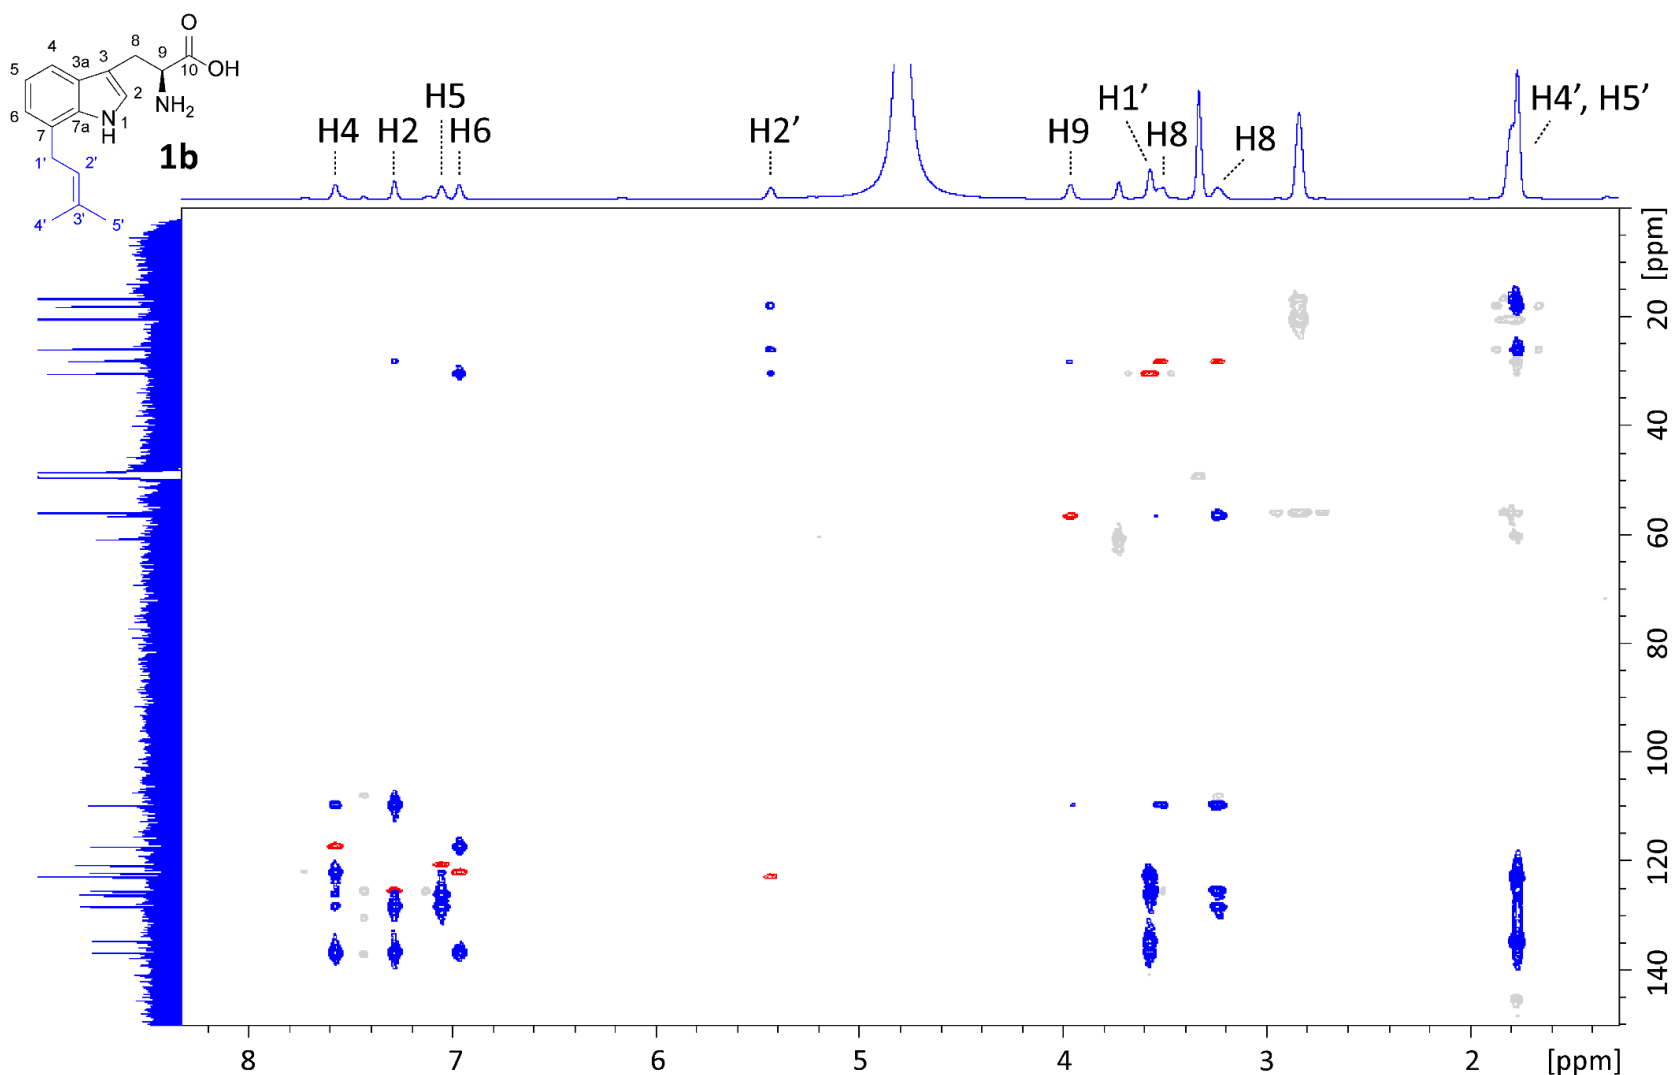

**Fig. S23**  $^1\text{H}$ (600 MHz)- $^{13}\text{C}$  (150 MHz) spectra and HSQC (red) and HMBC (blue) correlations of **1b** recorded in a mixture of 70 % (v/v) methanol- $\text{d}_4$  and 30 % (v/v) deuterium oxide. Peaks of the impurities (correlations shown in grey) mostly came from the trace presence of **1a**, while a few peaks were from unidentified impurities. Due to the lack of peak splitting in the extrapolated  $^1\text{H}$  spectrum, a separate  $^1\text{H}$  spectrum (**Fig. S21**) was used to acquire accurate peak shapes for data interpretation.



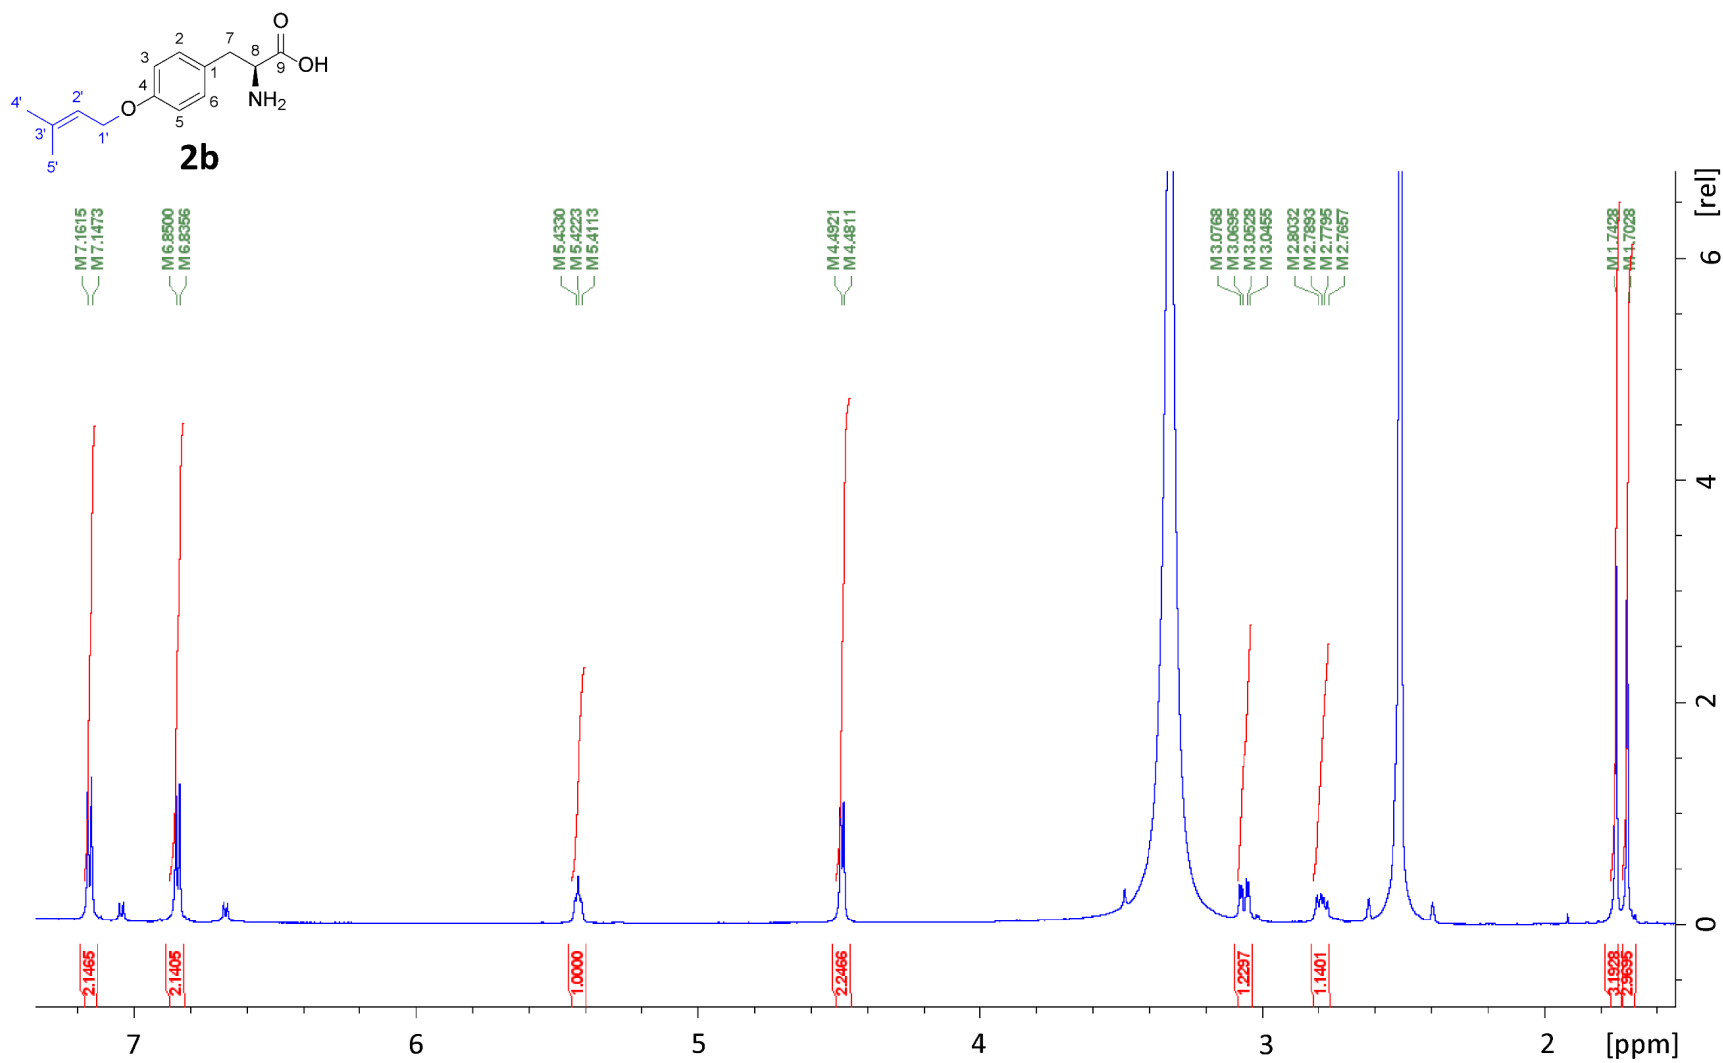

Fig. S24  $^1\text{H}$ -NMR spectrum (600 MHz) of **2b** recorded in DMSO- $d_6$ .

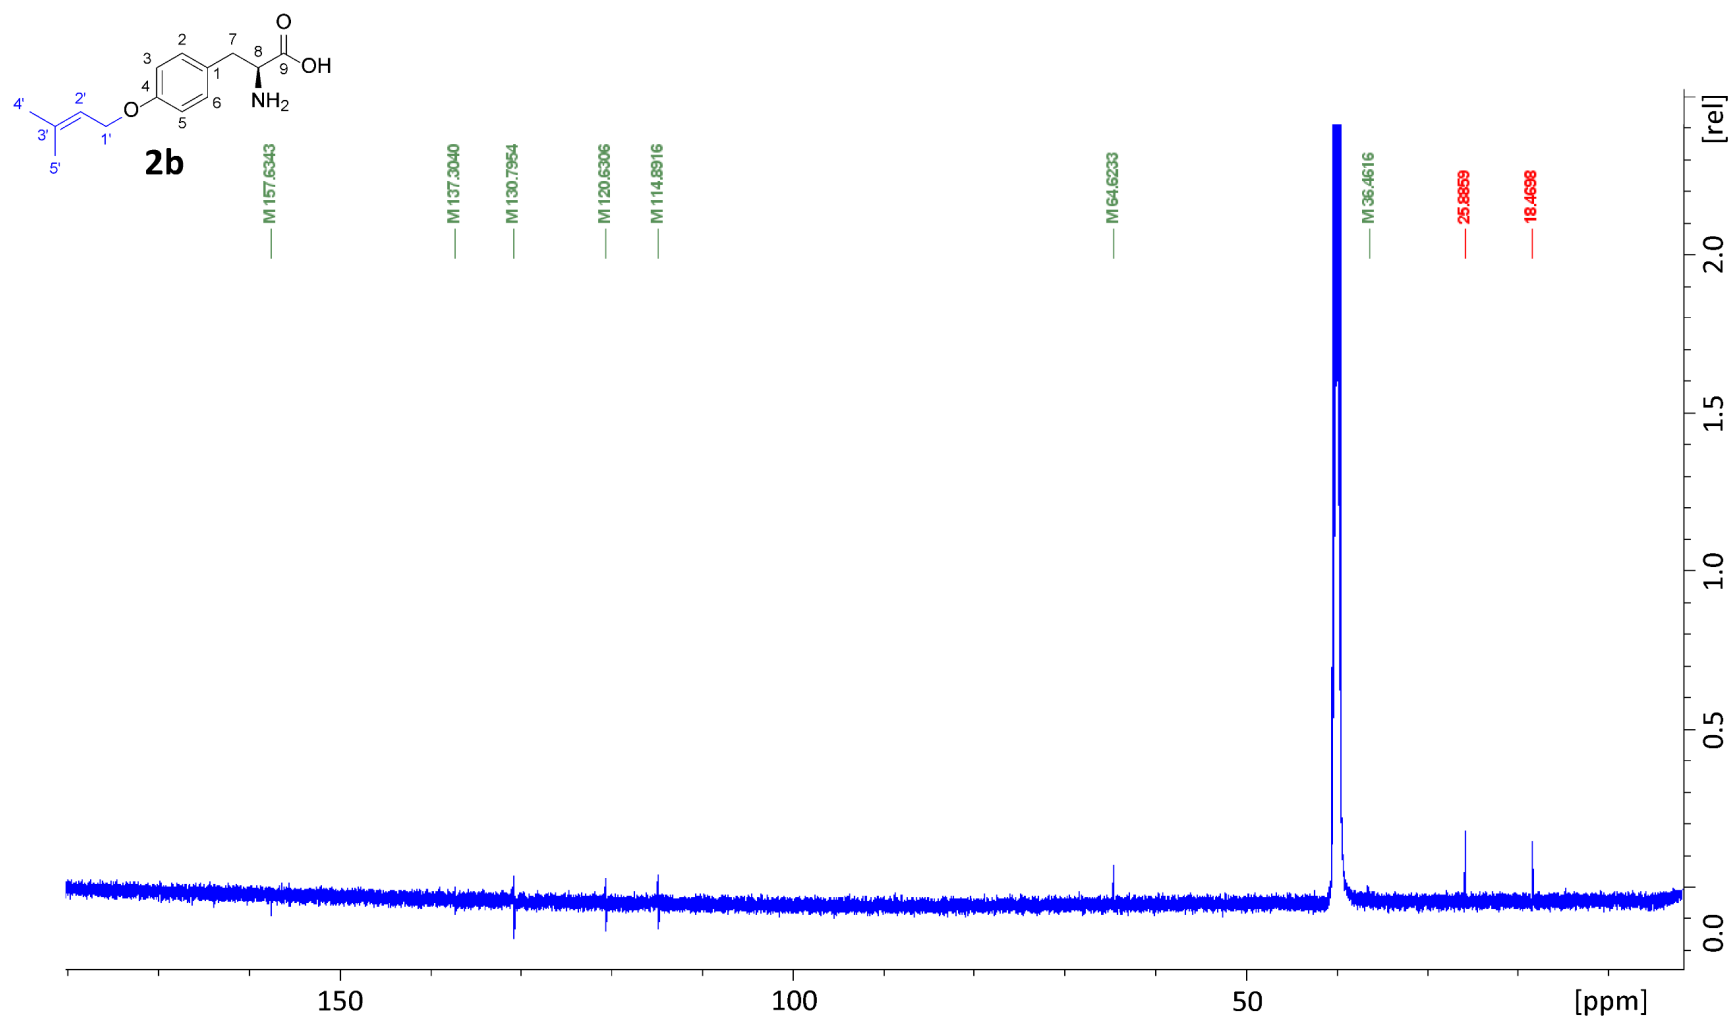

**Fig. S25** <sup>13</sup>C spectrum (150 MHz) of **2b** recorded in DMSO-d<sub>6</sub>.

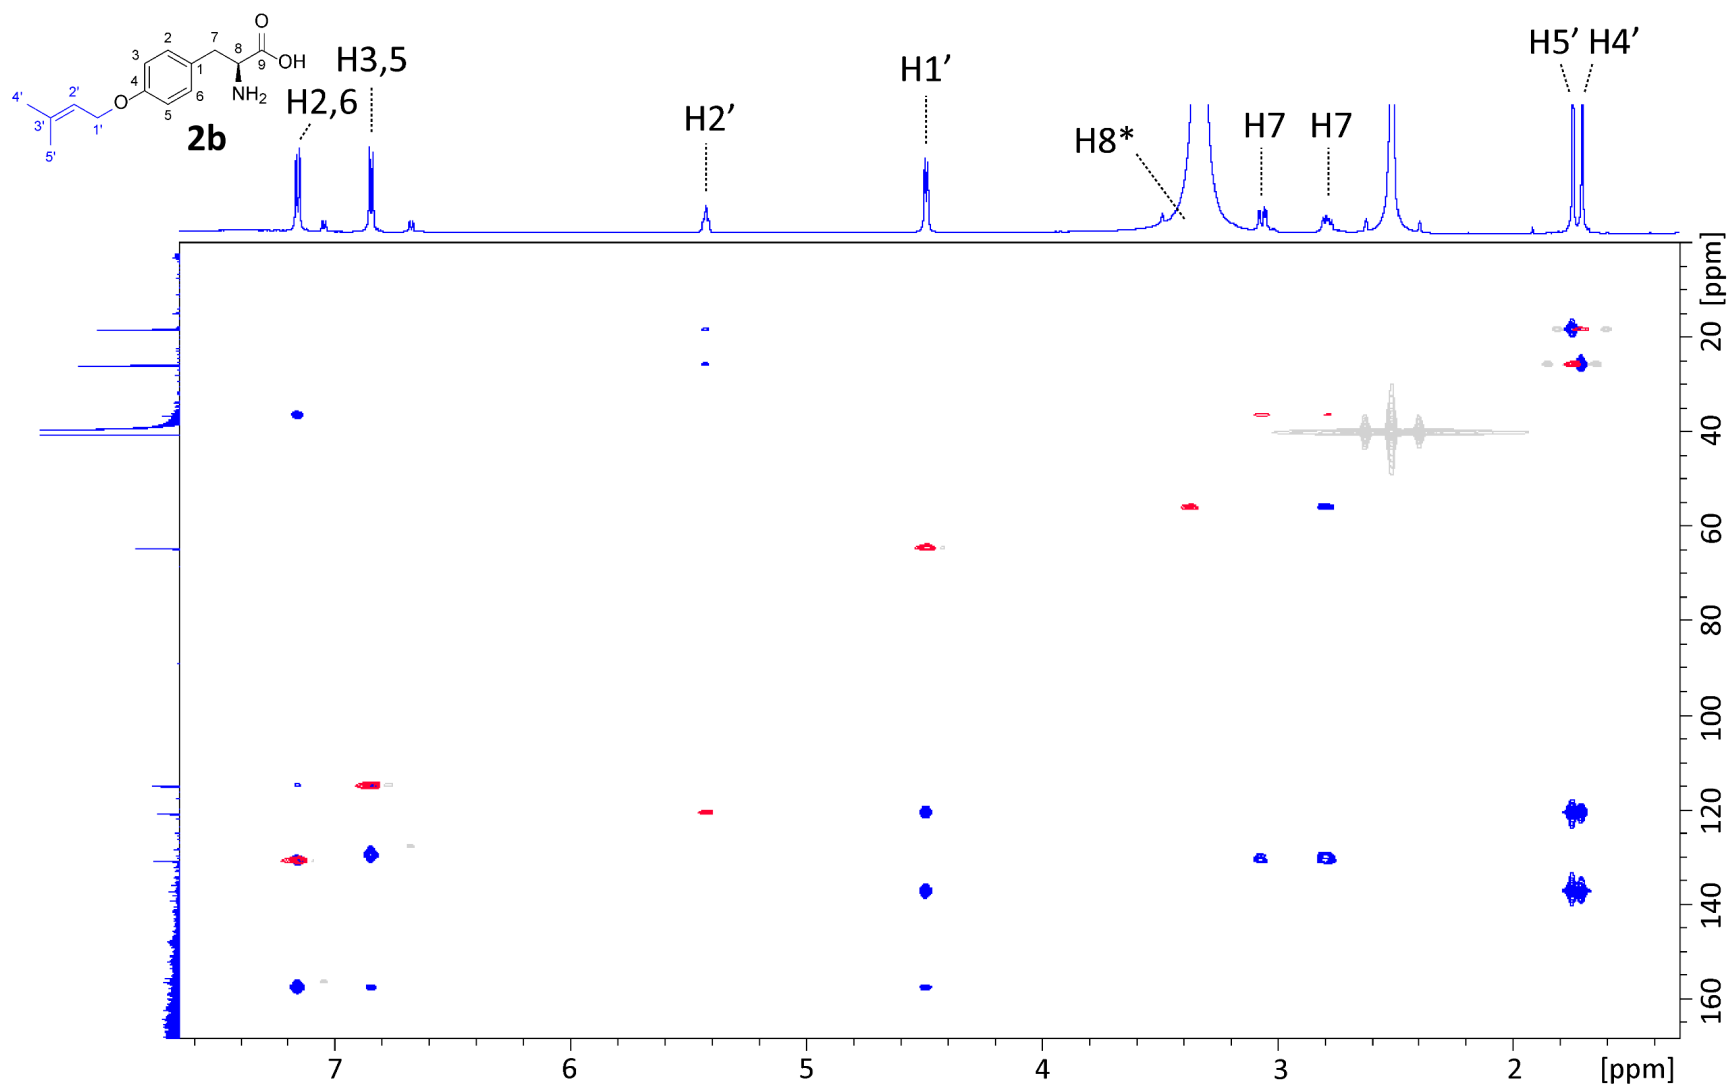

**Fig. S26**  $^1\text{H}$ (600 MHz)- $^{13}\text{C}$  (150 MHz) spectra and HSQC (red) and HMBC (blue) correlations of **2b** recorded in DMSO- $d_6$ .

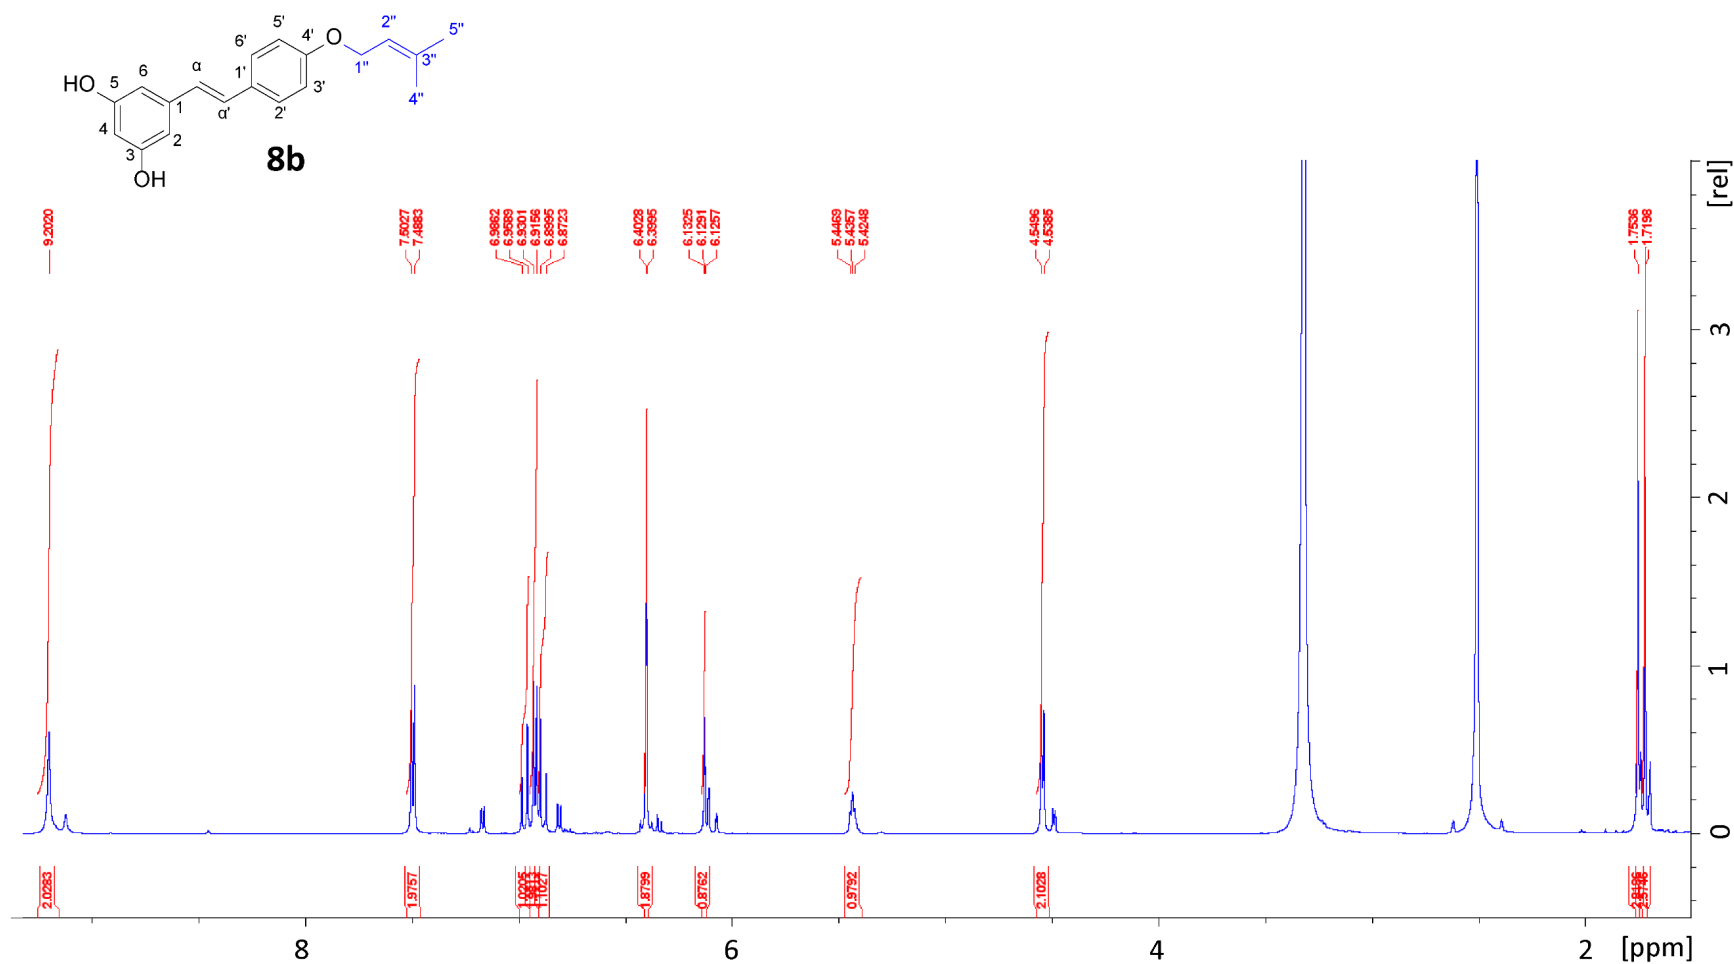

Fig. S27  $^1\text{H}$ -NMR spectrum (600 MHz) of **8b** recorded in DMSO- $d_6$ .

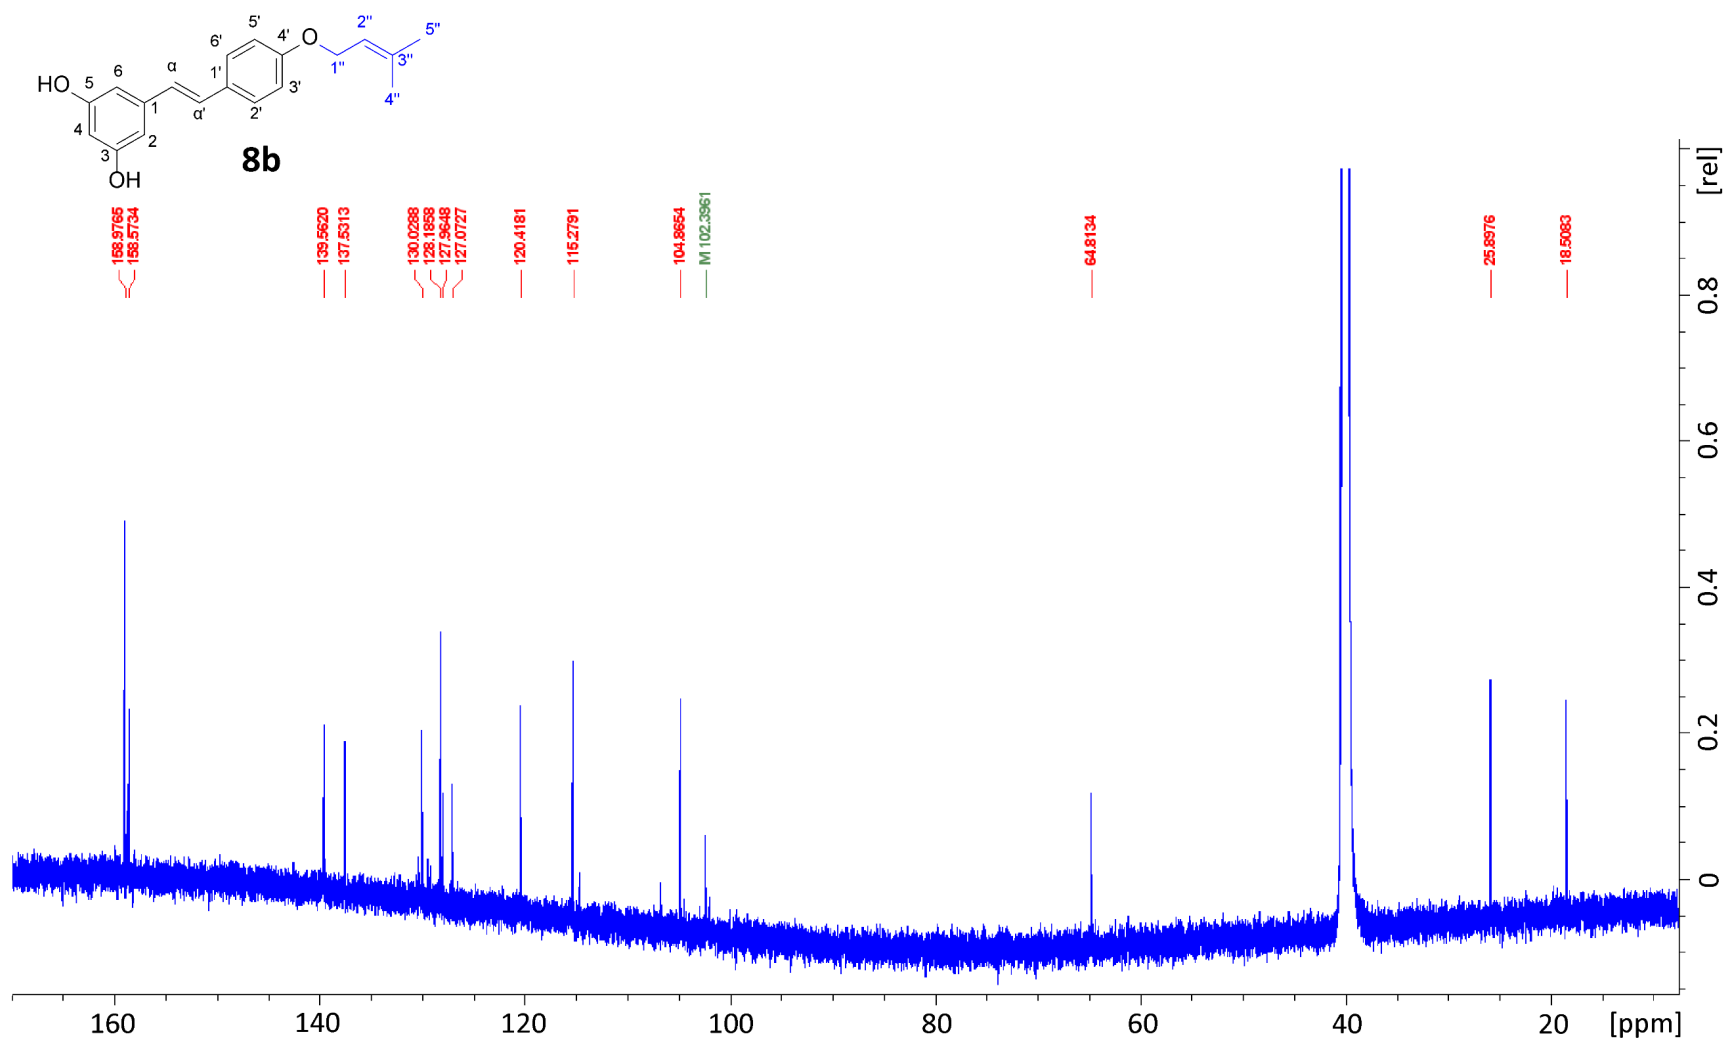

Fig. S28  $^{13}\text{C}$  spectrum (150 MHz) of **8b** recorded in DMSO- $d_6$ .

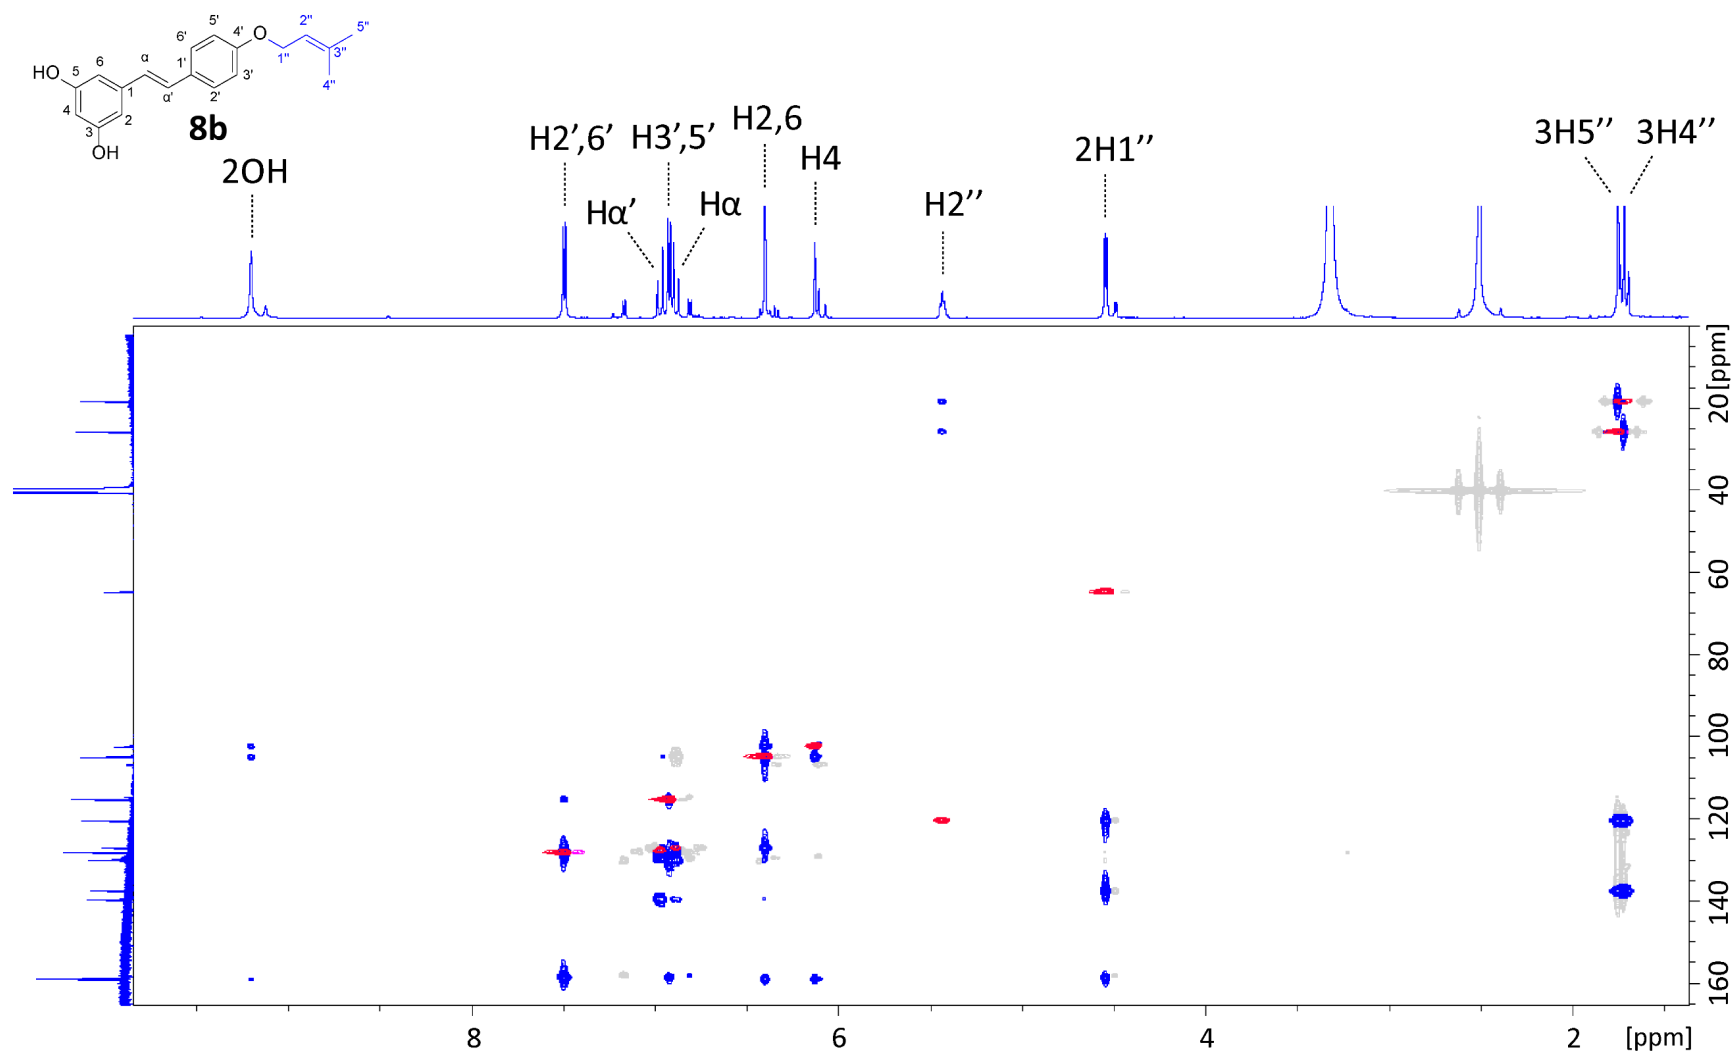

**Fig. S29**  $^1\text{H}$ (600 MHz)- $^{13}\text{C}$  (150 MHz) spectra and HSQC (red) and HMBC (blue) correlations of **8b** recorded in DMSO- $d_6$ .

**Table S6** ESI-FT-MS data of the purified prenylated products produced using RePT

| Compound                                     | Chemical formula                                              | [M+H] <sup>+</sup> |           | Deviation (ppm) |
|----------------------------------------------|---------------------------------------------------------------|--------------------|-----------|-----------------|
|                                              |                                                               | Calculated         | Observed  |                 |
| <i>N</i> 1-prenyl-L-tryptophan ( <b>1a</b> ) | C <sub>16</sub> H <sub>20</sub> O <sub>2</sub> N <sub>2</sub> | 273.15975          | 273.16019 | 1.59            |
| <i>C</i> 7-prenyl-L-tryptophan ( <b>1b</b> ) | C <sub>16</sub> H <sub>20</sub> O <sub>2</sub> N <sub>2</sub> | 273.15975          | 273.15991 | 0.57            |
| <i>O</i> 4-prenyl-L-tyrosine ( <b>2b</b> )   | C <sub>14</sub> H <sub>19</sub> O <sub>3</sub> N              | 250.14377          | 250.14401 | 0.96            |
| <i>O</i> 4'-prenyl-resveratrol ( <b>8b</b> ) | C <sub>19</sub> H <sub>20</sub> O <sub>3</sub>                | 297.14852          | 297.14871 | 0.64            |

### Synthesis of dimethylallyl pyrophosphate tri-ammonium salt (DMAPP)

The synthesis of DMAPP was performed based on previously published protocols (Woodside et al. 1988; Chekan et al. 2020; Eggbauer et al. 2022) with several adaptations. Tris(tetrabutylammonium) hydrogen pyrophosphate 3.09 g (3.32 mmol) was dissolved in 1.5 mL acetonitrile (ULC/MS-grade). Prenyl bromide 202  $\mu$ l (1.66 mmol) was added to the solution. The mixture was flushed with nitrogen and left to stir at room temperature for 5 h. The yellowish oil was then mixed with 1 mL of ion exchange buffer (2 g/L of NH<sub>4</sub>HCO<sub>3</sub> in 2 % (v/v) isopropyl alcohol in water) and loaded onto a pre-treated ion-exchange column. The ion-exchange column was prepared by washing 40 mL dry volume of DOWEX AG 50W-X8 resin (H<sup>+</sup> form, 100–200 mesh) (Bio-Rad Laboratories, Hercules, CA, USA) packed in a glass chromatography column with 170 mL of concentrated aq. ammonia. The column was further rinsed with 560 mL of water until the eluate reached pH 7. The column was equilibrated with 130 mL of ion-exchange buffer containing the reaction mixture. After the mixture was loaded, the reaction flask was rinsed with an additional 2 portions of 1 mL ion-exchange buffer, which were also loaded onto the column. The elution was performed with 80 mL of ion-exchange buffer (2 column volumes). Four fractions were collected and the presence of DMAPP was confirmed with thin-layer chromatography (TLC). Separation of DMAPP with TLC (*R*<sub>f</sub> = 0.52) in each fraction was performed with 1-propanol:NH<sub>4</sub>OH:water (8:5:2) on a silica gel plate. The reaction products were visualized by staining with KMnO<sub>4</sub> stain (200 mL water containing 1.5 g KMnO<sub>4</sub>, 10 g K<sub>2</sub>CO<sub>3</sub>, and 1.25 mL of 10 % NaOH). The fractions containing DMAPP were pooled and lyophilized, yielding 718 mg of white powder.

The purity of the synthesized DMAPP was assessed by testing substrate conversion with RePT and L-tryptophan at the same reaction condition as described in the substrate specificity test. Substrate conversion was reduced from 100 % to 59 % when using the synthesized DMAPP obtained after ion exchange chromatography compared to the DMAPP standard. Additionally, the synthesized DMAPP was analyzed by HILIC-UHPLC-ESI-IT-MS<sup>n</sup>. A UHPLC-MS system identical to the one described in the substrate specificity test was equipped with an Acquity UPLC BEH HILIC column (2.1 x 150 mm, 1.7  $\mu$ m) (Waters, Milford, MA, USA). The column temperature was set at 25 °C. The flow rate used was 400  $\mu$ L/min with the following eluents: (A) 25 mM NH<sub>4</sub>HCO<sub>3</sub> in water and (B) 25 mM NH<sub>4</sub>HCO<sub>3</sub> in 10 % (v/v) water in acetonitrile. The elution gradient was 1 min isocratic 100 %B; 22 min linear gradient 100-90 %B; 5 min linear gradient 90-80 %B; 1 min linear gradient 80-100 %B; 12 min isocratic 100 %B. Mass spectrometric analysis was performed with the same MS system and settings as described in the substrate specificity test, with the exception of using a mass acquisition range of *m/z* 140-1000. Additionally, dynamic mass exclusion settings were adjusted. Most intense ion was fragmented 4 times with a repeat duration of 15 s and then excluded for fragmentation for 15 s. The purity of DMAPP was determined, based on MS<sup>1</sup> peak area in negative ionization mode, to be 70 % (**Fig. S30a**).

Further purification of DMAPP was performed with Flash chromatography, using Büchi FlashPure EcoFlex diol 4 g cartridge connected to Büchi Pure C-850 FlashPrep (Flawil, Switzerland). The eluents (Buffer A and B) used were the same as those used for HILIC-UHPLC-ESI-IT-MS<sup>n</sup>. The synthesized DMAPP was resolubilized with Buffer A. The elution was performed with a flow rate of 15 mL/min with the following program: 1 column volume (CV) isocratic 100 %B; 20 CV linear gradient 100-50 %B; 5 CV isocratic 50 %B; 1 CV linear gradient 50-100 %B; 10 CV isocratic 100 %B. As DMAPP and the impurities could not be monitored via detection by UV or ELSD in the FlashPrep system, the obtained fractions were analyzed by direction injection ESI-IT-MS<sup>n</sup>. Fractions containing DMAPP ([M-H]<sup>-</sup> *m/z* 245 in MS NI, with MS<sup>2</sup> fragments *m/z* 227, 79, 159) (**Fig. S30b**) without impurities were pooled. Pooled fractions underwent solvent evaporation under reduced pressure and lyophilization, yielding 251 mg of the purified DMAPP. The purified DMAPP was assessed in an enzymatic reaction again, yielding a comparable substrate conversion to the reaction using DMAPP standard (**Fig. S30c**).

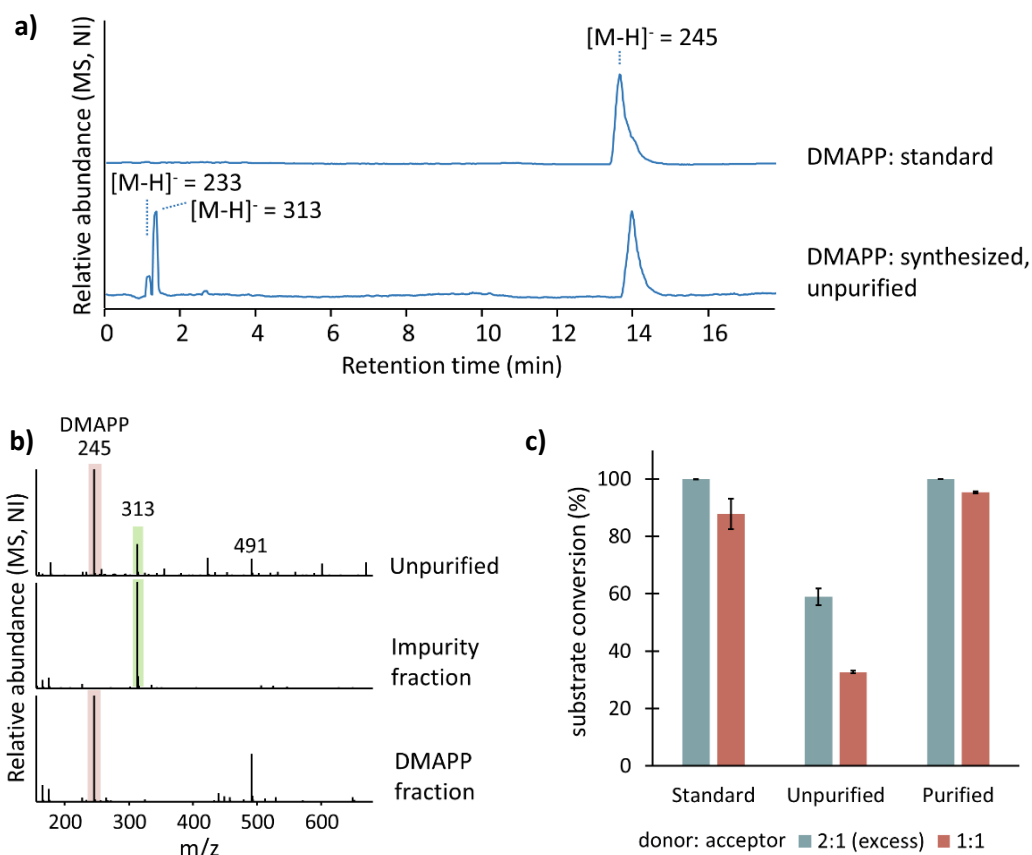

**Fig. S30 a)** HILIC-UHPLC-ESI-IT-MS NI chromatogram of DMAPP standard and synthesized, unpurified DMAPP obtained after ion-exchange and lyophilization, injected with a concentration of 1 mg/mL; **b)** MS NI spectra of unpurified DMAPP, a fraction containing the main impurity, and a fraction containing DMAPP, obtained from a direct injection to ESI-IT-MS<sup>n</sup>. The corresponding  $m/z$  of 245, 313, and 491 were  $[M-H]^-$  of DMAPP, an unidentified impurity, and in-source dimer ( $[2M-H]^-$ ) of DMAPP; **c)** substrate conversion (%) of L-tryptophan in the presence of RePT and different DMAPPs. Two ratios of the concentration of DMAPP:L-tryptophan were used (2:1 and 1:1).

### Upscaled production of prenylated compounds

#### *N*1-prenyl-L-tryptophan (**1a**) and *C*7-prenyl-L-tryptophan (**1b**)

The reaction was performed in 100 mL of 50 mM Tris/HCl pH 7.5 buffer containing 1 mM substrate, 1.9 mM DMAPP, and 0.1 mg/mL RePT. The reaction mixture was incubated in an oven at 37 °C for 24 h. Due to protein aggregation formed when using rotation or shaking to stir the reaction mixture, the mixture were left incubated without agitation. The enzyme was then removed by filtration using an ultra-centrifugal filter with 30 kDa molecular weight cut-off. The permeate was lyophilized, resuspended in 15 % (v/v) acetonitrile containing 1 % (v/v) formic acid, and purified using flash chromatography. The solution was loaded onto a 12 g FlashPure ID C18 40  $\mu$ m connected to a Pure C-850 FlashPrep system (Büchi, Flawil, Switzerland). The flow rate used was 30 mL/min with the following eluents: (A) water containing 1 % (v/v) formic acid and (B) acetonitrile containing 1 % (v/v) formic acid. The elution program was as follows: 2 CV isocratic at 15 %B; 11 CV linear gradient of 15-55 %B; 1 CV linear gradient of 55-100 %B; 0.5 CV linear gradient of 100-15 %B; 1 CV isocratic at 15 %B. The presence of prenylated product was monitored with UV 280 nm detection. The composition of the collected fractions was confirmed with RP-UHPLC-PDA-ESI-IT-MS<sup>n</sup> using the same method as described in substrate specificity test. Fractions containing the compound of interest were pooled,



underwent solvent evaporation using rotary evaporation under reduced pressure, and were further dried under a nitrogen stream overnight at 35 °C. The sample was lyophilized and stored at –20 °C for further investigation.

*O*4-prenyl-L-tyrosine (**2b**) and *O*4'-prenyl-resveratrol (**8b**)

The reactions were performed in 35 mL of 50 mM Tris/HCl pH 7.5 buffer containing 5 mM CaCl<sub>2</sub>, 1 mM substrate, 1.8 mM DMAPP, and 0.1 mg/mL RePT for producing **2b** and 2 mg RePT/mL for **8b**. The reaction mixtures were incubated in an oven at 37 °C for 24 h without agitation. The enzymatic products were purified by using solid-phase extraction with Sep-Pak C18 6 cc Vac cartridge with 500 mg sorbent column (Waters, Milford, MA, USA) connected to an SPE vacuum manifold system (Waters, Milford, MA, USA). The column was conditioned with 2 x 6 mL of acetonitrile and equilibrated with 5 x 6 mL 0.1 % (v/v) formic acid in water (**2b**) or 0.1 % (v/v) formic in 20 % (v/v) acetonitrile (**8b**). Samples were loaded on the column and the elution was performed with a series of 0-40 % acetonitrile containing 0.1% formic acid (**2b**) or 20-60 % acetonitrile containing 0.1% formic acid (**8b**). The composition of the collected fractions was confirmed with RP-UHPLC-PDA-ESI-IT-MS<sup>n</sup>. Fractions containing the compound of interest were pooled, and were further dried under a nitrogen stream overnight at 35 °C. The sample was lyophilized and stored at –20 °C for further investigation.

## References

- Burkhardt I, Ye Z, Janevska S, Tudzynski B, Dickschat JS (2019) Biochemical and mechanistic characterization of the fungal reverse *N*-1-dimethylallyltryptophan synthase DMATS1<sub>FF</sub>. *ACS Chem Biol* 14:2922–2931. <https://doi.org/10.1021/acschembio.9b00828>
- Chekan JR, Mckinnie SMK, Noel JP, Moore BS (2020) Algal neurotoxin biosynthesis repurposes the terpene cyclase structural fold into an *N*-prenyltransferase. *Proc Natl Acad Sci U S A* 117:12799–12805. <https://doi.org/10.1073/pnas.2001325117>
- Chen R, Gao B, Liu X, Ruan F, Zhang Y, Lou J, Feng K, Wunsch C, Li SM, Dai J, Sun F (2017) Molecular insights into the enzyme promiscuity of an aromatic prenyltransferase. *Nat Chem Biol* 13:226–234. <https://doi.org/10.1038/nchembio.2263>
- Eaton SA, Ronnebaum TA, Roose BW, Christianson DW (2022) Structural basis of substrate promiscuity and catalysis by the reverse prenyltransferase *N*-dimethylallyl-L-tryptophan synthase from *Fusarium fujikuroi*. *Biochemistry* 61:2025–2035. <https://doi.org/10.1021/acs.biochem.2c00350>
- Eggbauer B, Schrittwieser JH, Kerschbaumer B, Macheroux P, Kroutil W (2022) Regioselective biocatalytic C4-prenylation of unprotected tryptophan derivatives. *ChemBioChem* 23. <https://doi.org/10.1002/cbic.202200311>
- Fan A, Li SM (2016) Saturation mutagenesis on Arg244 of the tryptophan C4-prenyltransferase FgaPT2 leads to enhanced catalytic ability and different preferences for tryptophan-containing cyclic dipeptides. *Appl Microbiol Biotechnol* 100:5389–5399. <https://doi.org/10.1007/s00253-016-7365-3>
- Metzger U, Schall C, Zocher G, Unsöld I, Stec E, Li SM, Heide L, Stehle T (2009) The structure of dimethylallyl tryptophan synthase reveals a common architecture of aromatic prenyltransferases in fungi and bacteria. *Proc Natl Acad Sci U S A* 106:14309–14314. <https://doi.org/10.1073/pnas.0904897106>
- Trela BC, Waterhouse AL (1996) Resveratrol: Isomeric molar absorptivities and stability. *J Agric Food Chem* 44:1253–1257. <https://doi.org/10.1021/jf9504576>
- Woodside AB, Huang Z, Poulter CD (1988) Trisammonium geranyl diphosphate. *Org Synth* 66:211. <https://doi.org/10.15227/orgsyn.066.0211>
